# Supplementary material for: Ligand-Receptor Interactions of Lamivudine: A View from Charge Density Study and QM/MM Calculations
Source: MDPI journal article supplement (doi:10.3390/biomedicines11030743), 2023-03-01
Supplement: s1 [file s1]

Supporting Information for article:

# Ligand-Receptor Interactions of *Lamivudine*: A View from Charge Density Study and QM/MM Calculations

Alexander A. Korlyukov <sup>1</sup>, Adam. I. Stash <sup>1</sup>, Alexander O. Romanenko <sup>1</sup>, Damian Trzybiński <sup>2</sup>, Krzysztof Woźniak <sup>2</sup> and Anna V. Vologzhanina <sup>1,\*</sup>

<sup>1</sup> A. N. Nesmeyanov Institute of Organoelement Compounds, Russian Academy of Sciences, 28 Vavilov St., Moscow 19334, Russia; alex@xrlab.ineos.ac.ru (A.A.K.); astas@yandex.ru (A.I.S.); alex070401@gmail.com (A.R.R.)

<sup>2</sup> Biological and Chemical Research Centre, Department of Chemistry, University of Warsaw, Żwirki i Wigury 101, 02-089 Warszawa, Poland; dtrzybinski@cnbc.uw.edu.pl (D.T.); kwozniak@chem.uw.edu.pl (K.W.)

\* Correspondence: vologzhanina@mail.ru

**Citation:** Korlyukov, A.A.; Stash, A.I.; Romanenko, A.R.; Trzybiński, D.; Woźniak, K.; Vologzhanina, A.V. Ligand-Receptor Interactions of *Lamivudine*: A View from Charge Density Study and QM/MM Calculations. *Biomedicines* **2023**, *11*, x. <https://doi.org/10.3390/xxxxx>

Academic Editor: Eugenia Pechkova

Received: 3 February 2023

Revised: 21 February 2023

Accepted: 23 February 2023

Published: 28 February 2023

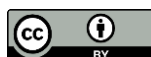

**Copyright:** © 2023 by the authors. Licensee MDPI, Basel, Switzerland. This article is an open access article distributed under the terms and conditions of the Creative Commons Attribution (CC BY) license (<https://creativecommons.org/licenses/by/4.0/>).

# DRK plots

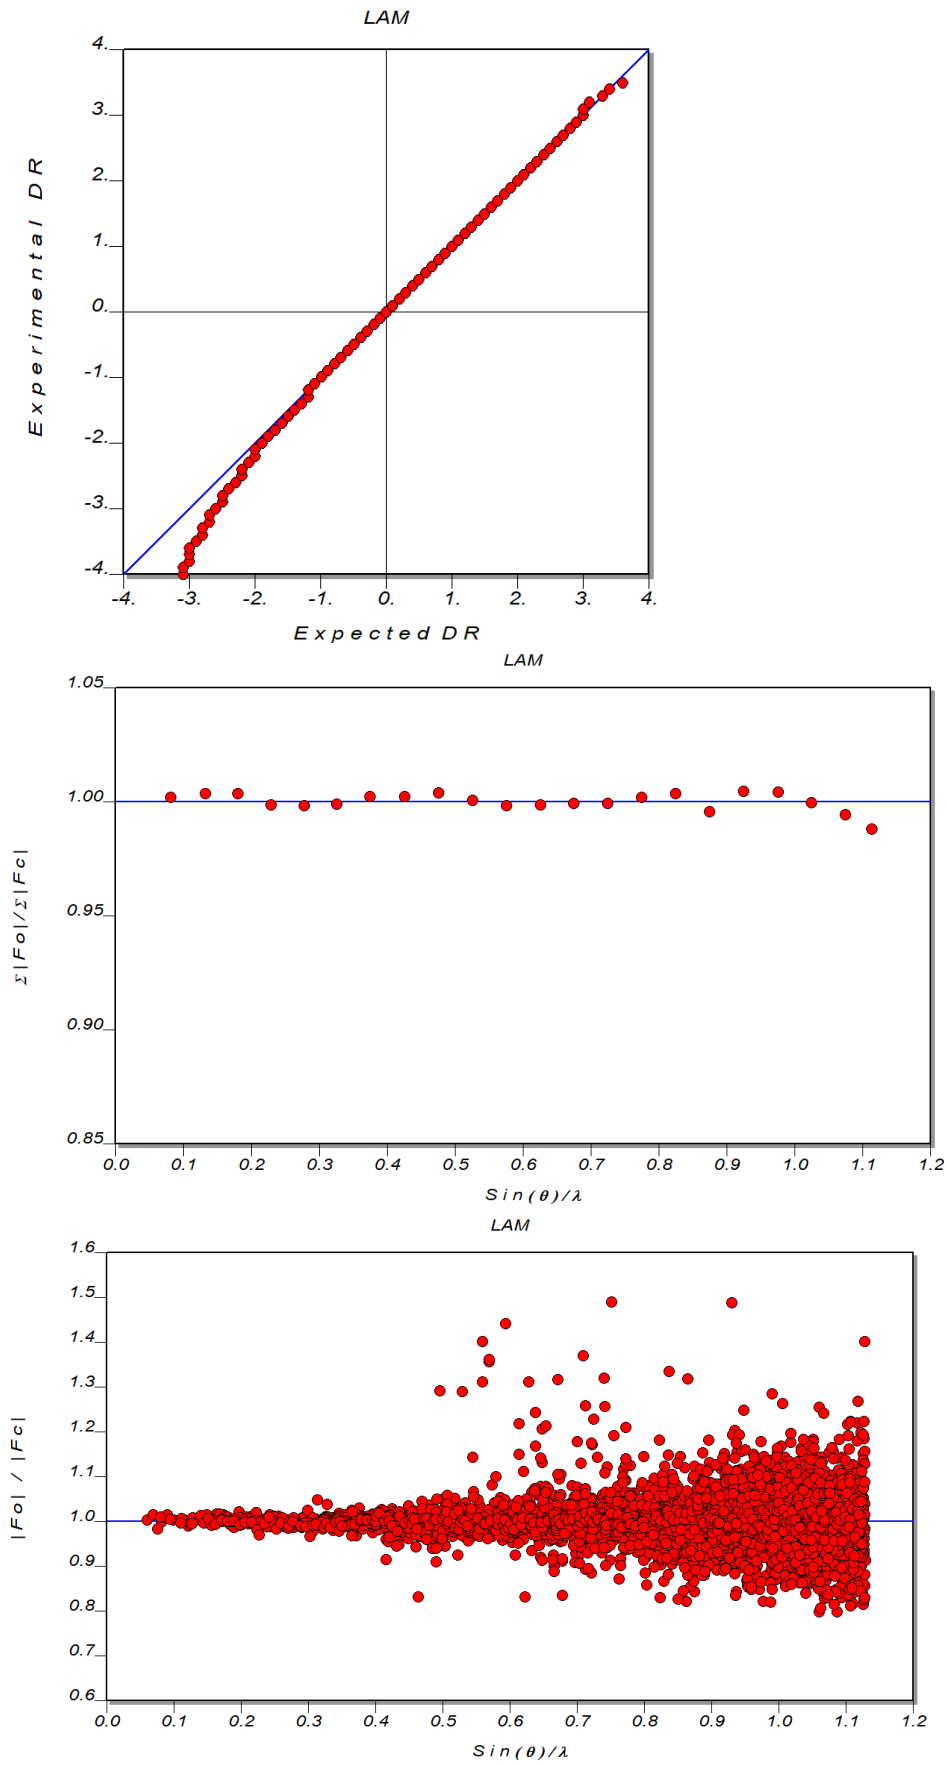

**Figure S1.** (a) Normal probability plot plotted against full dataset of *Lamivudine*; (b) Scale factor plot against resolution; (c)  $|Fo| / |Fc|$  against resolution.

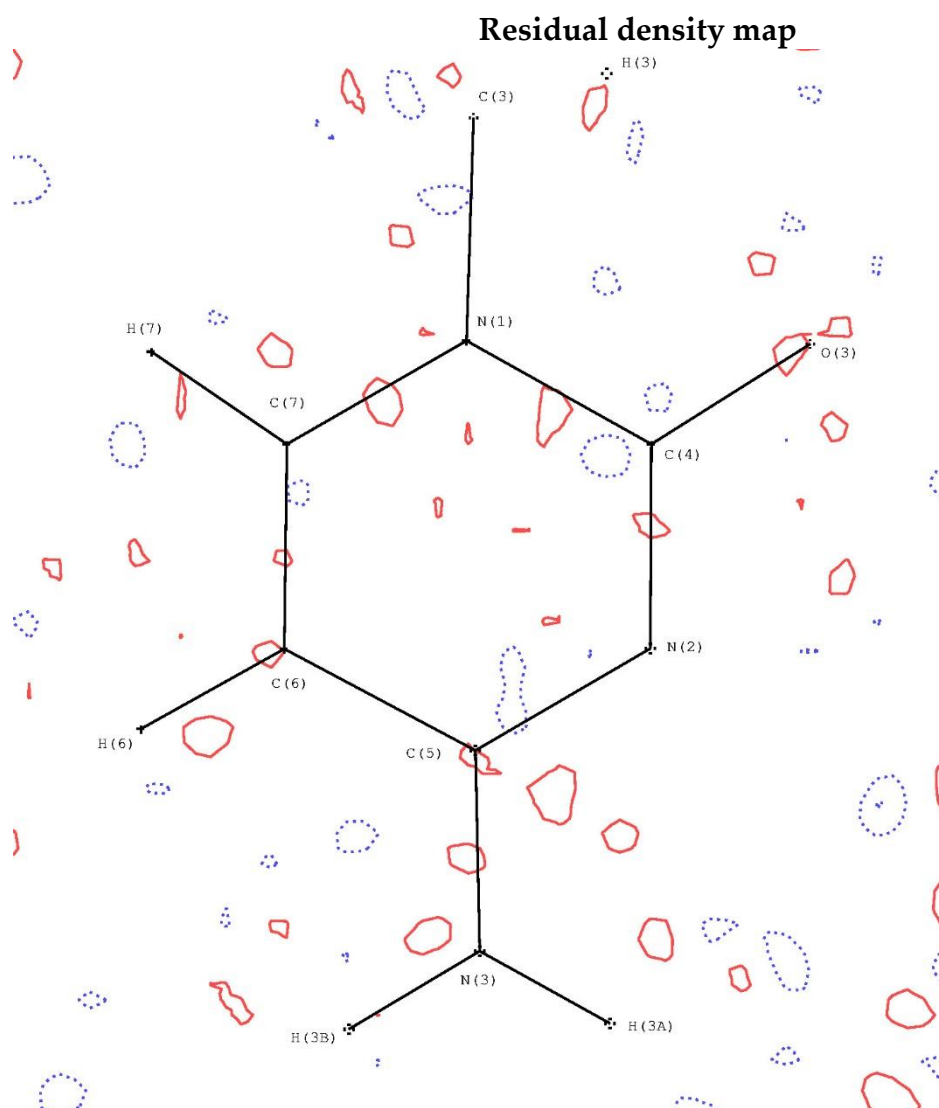

**Figure S2.** The residual density map in the section of (left) N(1), C(2) and C(4); (right) O(1), O(2) and C(24) atoms calculated using all data for *Lamivudine*. The isocontours are drawn every 0.05 eÅ<sup>-3</sup>; positive contours are shown in red, the negative contours are dashed blue.

fractal dimension ( $d^f$ ) vs. residual density ( $\rho_0$ )

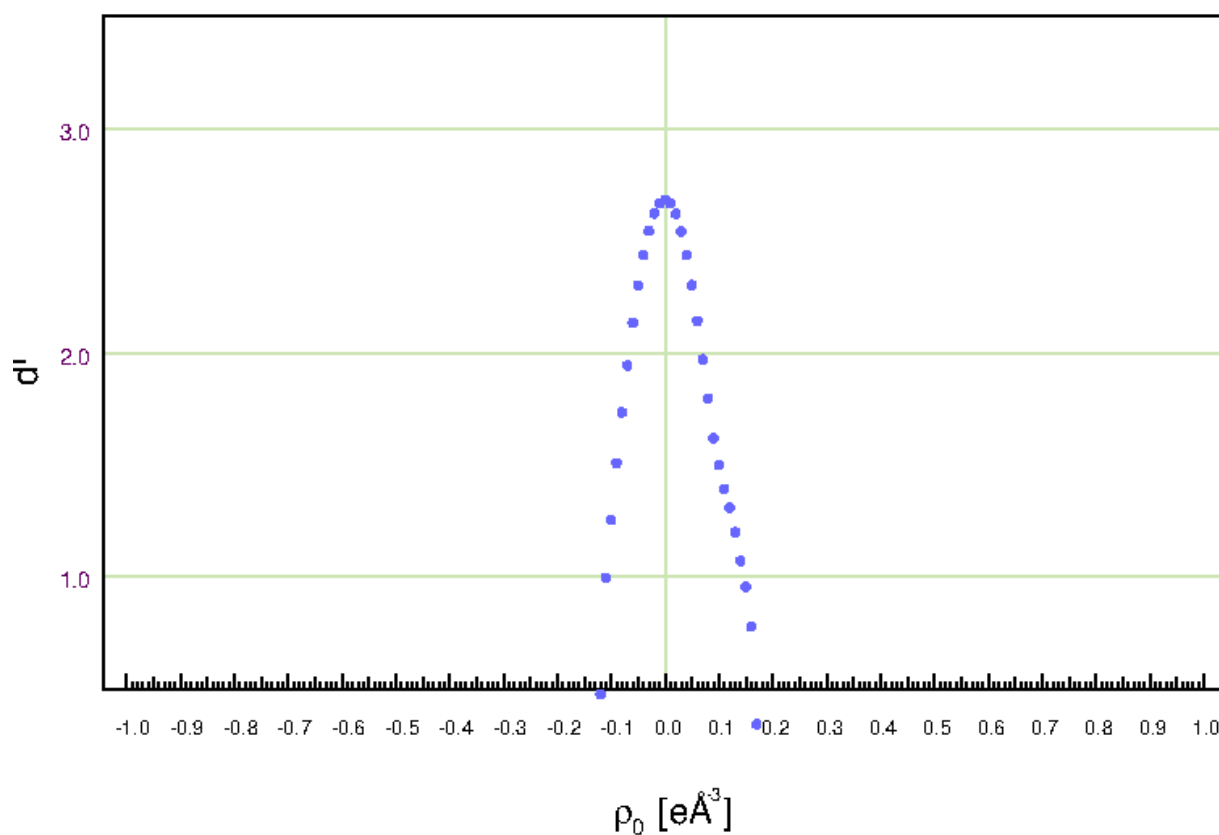

```
MODEL *model 4 4 1 0
FOUR fmod1 4 4 0 0 fmod2 -1 4 0 0
SELECT *fobs *fmod1 fmod2 print snlmin 0. snlmax 2.
GRID *3-points perp cryst
XYZ 0. 0. 0.
XYZ 1. 0. 0.
XYZ 0. 1. 0.
LIMITS xmin 0.0 xmax 8.7 nx 88
LIMITS ymin 0.0 ymax 8.7 ny 88
LIMITS zmin 0.0 zmax 26.4 nz 265
```

```
d'(0) = 2.6810
rho_min(d=2) = -0.0670 eA^-3
rho_max(d=2) = 0.0683 eA^-3
nx=88      rho_min: -0.12 eA^-3
ny=88      rho_max: 0.17 eA^-3
nz=265     delta rho: 0.29 eA^-3
```

**Figure S3.** Plot of the fractal dimension  $d^f$  vs. the residual electron density ( $\rho_0$ ) in the unit cell of *Lamivudine*. No resolution cutoff was applied to the data used for the Fourier transformation.

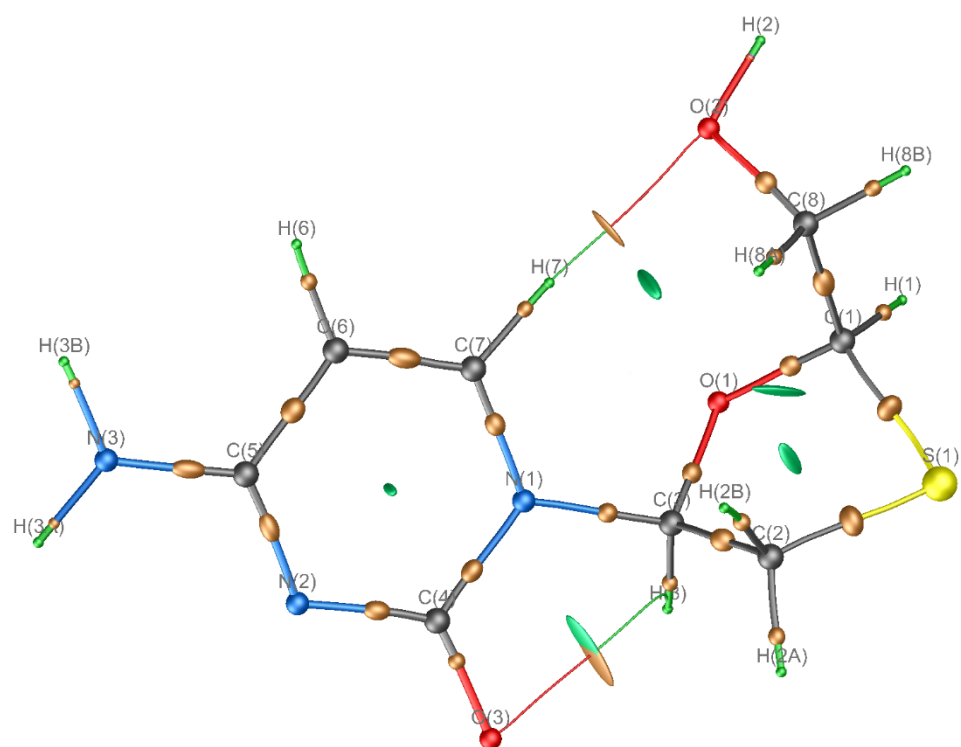

**Figure S4.** Molecular graph of *Lamivudine*. Orange and green ellipsoids denote bond and ring critical points.

### Atomic coordinates of complexes A and B in pdb format.

Model1

REMARK Generated by Multiwfn, Totally 379 atoms

|        |    |   |       |   |        |        |        |      |      |   |
|--------|----|---|-------|---|--------|--------|--------|------|------|---|
| HETATM | 1  | N | MOL A | 1 | -6.362 | 0.954  | -7.061 | 1.00 | 0.00 | N |
| HETATM | 2  | H | MOL A | 1 | -5.915 | 1.554  | -7.746 | 1.00 | 0.00 | H |
| HETATM | 3  | C | MOL A | 1 | -6.691 | 1.495  | -5.732 | 1.00 | 0.00 | C |
| HETATM | 4  | H | MOL A | 1 | -6.520 | 0.718  | -4.987 | 1.00 | 0.00 | H |
| HETATM | 5  | C | MOL A | 1 | -5.765 | 2.668  | -5.349 | 1.00 | 0.00 | C |
| HETATM | 6  | H | MOL A | 1 | -5.861 | 3.455  | -6.093 | 1.00 | 0.00 | H |
| HETATM | 7  | C | MOL A | 1 | -6.172 | 3.232  | -3.979 | 1.00 | 0.00 | C |
| HETATM | 8  | H | MOL A | 1 | -5.972 | 2.496  | -3.201 | 1.00 | 0.00 | H |
| HETATM | 9  | H | MOL A | 1 | -5.604 | 4.137  | -3.764 | 1.00 | 0.00 | H |
| HETATM | 10 | H | MOL A | 1 | -7.228 | 3.495  | -3.959 | 1.00 | 0.00 | H |
| HETATM | 11 | C | MOL A | 1 | -4.300 | 2.160  | -5.339 | 1.00 | 0.00 | C |
| HETATM | 12 | H | MOL A | 1 | -4.243 | 1.238  | -4.759 | 1.00 | 0.00 | H |
| HETATM | 13 | H | MOL A | 1 | -4.008 | 1.933  | -6.363 | 1.00 | 0.00 | H |
| HETATM | 14 | C | MOL A | 1 | -3.256 | 3.125  | -4.771 | 1.00 | 0.00 | C |
| HETATM | 15 | H | MOL A | 1 | -3.415 | 3.266  | -3.703 | 1.00 | 0.00 | H |
| HETATM | 16 | H | MOL A | 1 | -2.259 | 2.711  | -4.922 | 1.00 | 0.00 | H |
| HETATM | 17 | H | MOL A | 1 | -3.319 | 4.084  | -5.275 | 1.00 | 0.00 | H |
| HETATM | 18 | C | MOL A | 1 | -8.201 | 1.798  | -5.731 | 1.00 | 0.00 | C |
| HETATM | 19 | O | MOL A | 1 | -8.668 | 2.587  | -6.547 | 1.00 | 0.00 | O |
| HETATM | 20 | N | MOL A | 1 | -7.287 | -3.804 | 4.074  | 1.00 | 0.00 | N |
| HETATM | 21 | H | MOL A | 1 | -8.123 | -3.610 | 3.521  | 1.00 | 0.00 | H |
| HETATM | 22 | C | MOL A | 1 | -5.986 | -3.760 | 3.371  | 1.00 | 0.00 | C |
| HETATM | 23 | H | MOL A | 1 | -5.756 | -4.791 | 3.112  | 1.00 | 0.00 | H |
| HETATM | 24 | C | MOL A | 1 | -6.137 | -2.975 | 2.049  | 1.00 | 0.00 | C |
| HETATM | 25 | H | MOL A | 1 | -6.963 | -3.394 | 1.479  | 1.00 | 0.00 | H |
| HETATM | 26 | H | MOL A | 1 | -6.367 | -1.933 | 2.271  | 1.00 | 0.00 | H |
| HETATM | 27 | C | MOL A | 1 | -4.861 | -3.052 | 1.195  | 1.00 | 0.00 | C |
| HETATM | 28 | H | MOL A | 1 | -4.069 | -2.485 | 1.686  | 1.00 | 0.00 | H |
| HETATM | 29 | H | MOL A | 1 | -4.558 | -4.098 | 1.143  | 1.00 | 0.00 | H |
| HETATM | 30 | C | MOL A | 1 | -4.985 | -2.558 | -0.249 | 1.00 | 0.00 | C |
| HETATM | 31 | O | MOL A | 1 | -4.091 | -2.913 | -1.042 | 1.00 | 0.00 | O |
| HETATM | 32 | O | MOL A | 1 | -5.921 | -1.792 | -0.604 | 1.00 | 0.00 | O |
| HETATM | 33 | C | MOL A | 1 | -4.827 | -3.192 | 4.238  | 1.00 | 0.00 | C |
| HETATM | 34 | O | MOL A | 1 | -5.054 | -2.223 | 4.970  | 1.00 | 0.00 | O |
| HETATM | 35 | N | MOL A | 1 | -2.495 | -1.015 | 4.590  | 1.00 | 0.00 | N |
| HETATM | 36 | H | MOL A | 1 | -3.199 | -1.232 | 3.899  | 1.00 | 0.00 | H |
| HETATM | 37 | C | MOL A | 1 | -1.978 | 0.365  | 4.666  | 1.00 | 0.00 | C |
| HETATM | 38 | H | MOL A | 1 | -0.912 | 0.310  | 4.452  | 1.00 | 0.00 | H |
| HETATM | 39 | C | MOL A | 1 | -2.606 | 1.248  | 3.570  | 1.00 | 0.00 | C |
| HETATM | 40 | H | MOL A | 1 | -2.482 | 0.736  | 2.614  | 1.00 | 0.00 | H |
| HETATM | 41 | C | MOL A | 1 | -4.103 | 1.499  | 3.781  | 1.00 | 0.00 | C |
| HETATM | 42 | H | MOL A | 1 | -4.267 | 2.075  | 4.690  | 1.00 | 0.00 | H |
| HETATM | 43 | H | MOL A | 1 | -4.494 | 2.063  | 2.933  | 1.00 | 0.00 | H |
| HETATM | 44 | H | MOL A | 1 | -4.643 | 0.554  | 3.837  | 1.00 | 0.00 | H |
| HETATM | 45 | C | MOL A | 1 | -1.878 | 2.592  | 3.478  | 1.00 | 0.00 | C |
| HETATM | 46 | H | MOL A | 1 | -0.821 | 2.424  | 3.280  | 1.00 | 0.00 | H |
| HETATM | 47 | H | MOL A | 1 | -2.299 | 3.180  | 2.663  | 1.00 | 0.00 | H |
| HETATM | 48 | H | MOL A | 1 | -1.981 | 3.155  | 4.404  | 1.00 | 0.00 | H |
| HETATM | 49 | C | MOL A | 1 | -2.085 | 0.990  | 6.066  | 1.00 | 0.00 | C |
| HETATM | 50 | O | MOL A | 1 | -1.185 | 1.724  | 6.468  | 1.00 | 0.00 | O |

|        |     |   |     |   |   |        |        |        |      |      |   |
|--------|-----|---|-----|---|---|--------|--------|--------|------|------|---|
| HETATM | 51  | N | MOL | A | 1 | 1.137  | 0.477  | 7.673  | 1.00 | 0.00 | N |
| HETATM | 52  | H | MOL | A | 1 | 0.191  | 0.728  | 7.417  | 1.00 | 0.00 | H |
| HETATM | 53  | C | MOL | A | 1 | 2.225  | 1.169  | 6.962  | 1.00 | 0.00 | C |
| HETATM | 54  | H | MOL | A | 1 | 3.186  | 0.775  | 7.294  | 1.00 | 0.00 | H |
| HETATM | 55  | C | MOL | A | 1 | 2.098  | 0.923  | 5.452  | 1.00 | 0.00 | C |
| HETATM | 56  | H | MOL | A | 1 | 1.177  | 1.387  | 5.098  | 1.00 | 0.00 | H |
| HETATM | 57  | H | MOL | A | 1 | 2.926  | 1.430  | 4.955  | 1.00 | 0.00 | H |
| HETATM | 58  | C | MOL | A | 1 | 2.104  | -0.504 | 4.996  | 1.00 | 0.00 | C |
| HETATM | 59  | C | MOL | A | 1 | 2.691  | -1.543 | 5.633  | 1.00 | 0.00 | C |
| HETATM | 60  | H | MOL | A | 1 | 3.222  | -1.485 | 6.574  | 1.00 | 0.00 | H |
| HETATM | 61  | N | MOL | A | 1 | 2.518  | -2.697 | 4.902  | 1.00 | 0.00 | N |
| HETATM | 62  | H | MOL | A | 1 | 2.908  | -3.589 | 5.195  | 1.00 | 0.00 | H |
| HETATM | 63  | C | MOL | A | 1 | 1.837  | -2.463 | 3.731  | 1.00 | 0.00 | C |
| HETATM | 64  | C | MOL | A | 1 | 1.457  | -3.288 | 2.665  | 1.00 | 0.00 | C |
| HETATM | 65  | H | MOL | A | 1 | 1.725  | -4.335 | 2.661  | 1.00 | 0.00 | H |
| HETATM | 66  | C | MOL | A | 1 | 0.739  | -2.727 | 1.597  | 1.00 | 0.00 | C |
| HETATM | 67  | H | MOL | A | 1 | 0.453  | -3.345 | 0.761  | 1.00 | 0.00 | H |
| HETATM | 68  | C | MOL | A | 1 | 0.426  | -1.355 | 1.605  | 1.00 | 0.00 | C |
| HETATM | 69  | H | MOL | A | 1 | -0.118 | -0.920 | 0.778  | 1.00 | 0.00 | H |
| HETATM | 70  | C | MOL | A | 1 | 0.846  | -0.530 | 2.663  | 1.00 | 0.00 | C |
| HETATM | 71  | H | MOL | A | 1 | 0.629  | 0.527  | 2.633  | 1.00 | 0.00 | H |
| HETATM | 72  | C | MOL | A | 1 | 1.552  | -1.064 | 3.763  | 1.00 | 0.00 | C |
| HETATM | 73  | C | MOL | A | 1 | 2.236  | 2.673  | 7.252  | 1.00 | 0.00 | C |
| HETATM | 74  | O | MOL | A | 1 | 3.312  | 3.244  | 7.426  | 1.00 | 0.00 | O |
| HETATM | 75  | N | MOL | A | 1 | 5.253  | 4.018  | 4.256  | 1.00 | 0.00 | N |
| HETATM | 76  | H | MOL | A | 1 | 4.608  | 3.942  | 5.030  | 1.00 | 0.00 | H |
| HETATM | 77  | C | MOL | A | 1 | 4.730  | 4.423  | 2.947  | 1.00 | 0.00 | C |
| HETATM | 78  | H | MOL | A | 1 | 5.162  | 3.774  | 2.182  | 1.00 | 0.00 | H |
| HETATM | 79  | C | MOL | A | 1 | 3.201  | 4.231  | 2.953  | 1.00 | 0.00 | C |
| HETATM | 80  | H | MOL | A | 1 | 2.988  | 3.164  | 3.032  | 1.00 | 0.00 | H |
| HETATM | 81  | H | MOL | A | 1 | 2.790  | 4.723  | 3.836  | 1.00 | 0.00 | H |
| HETATM | 82  | C | MOL | A | 1 | 2.478  | 4.796  | 1.716  | 1.00 | 0.00 | C |
| HETATM | 83  | H | MOL | A | 1 | 2.635  | 5.872  | 1.667  | 1.00 | 0.00 | H |
| HETATM | 84  | C | MOL | A | 1 | 2.964  | 4.156  | 0.417  | 1.00 | 0.00 | C |
| HETATM | 85  | H | MOL | A | 1 | 2.819  | 3.079  | 0.451  | 1.00 | 0.00 | H |
| HETATM | 86  | H | MOL | A | 1 | 2.411  | 4.569  | -0.427 | 1.00 | 0.00 | H |
| HETATM | 87  | H | MOL | A | 1 | 4.019  | 4.371  | 0.264  | 1.00 | 0.00 | H |
| HETATM | 88  | C | MOL | A | 1 | 0.979  | 4.536  | 1.849  | 1.00 | 0.00 | C |
| HETATM | 89  | H | MOL | A | 1 | 0.600  | 4.999  | 2.759  | 1.00 | 0.00 | H |
| HETATM | 90  | H | MOL | A | 1 | 0.458  | 4.966  | 0.994  | 1.00 | 0.00 | H |
| HETATM | 91  | H | MOL | A | 1 | 0.792  | 3.464  | 1.878  | 1.00 | 0.00 | H |
| HETATM | 92  | C | MOL | A | 1 | 5.151  | 5.867  | 2.620  | 1.00 | 0.00 | C |
| HETATM | 93  | O | MOL | A | 1 | 5.608  | 6.155  | 1.516  | 1.00 | 0.00 | O |
| HETATM | 94  | N | MOL | A | 1 | 8.771  | 6.032  | 1.447  | 1.00 | 0.00 | N |
| HETATM | 95  | H | MOL | A | 1 | 8.046  | 5.580  | 1.992  | 1.00 | 0.00 | H |
| HETATM | 96  | C | MOL | A | 1 | 8.805  | 5.819  | -0.004 | 1.00 | 0.00 | C |
| HETATM | 97  | H | MOL | A | 1 | 9.832  | 5.595  | -0.283 | 1.00 | 0.00 | H |
| HETATM | 98  | C | MOL | A | 1 | 7.965  | 4.593  | -0.392 | 1.00 | 0.00 | C |
| HETATM | 99  | H | MOL | A | 1 | 8.336  | 3.743  | 0.181  | 1.00 | 0.00 | H |
| HETATM | 100 | H | MOL | A | 1 | 6.921  | 4.744  | -0.128 | 1.00 | 0.00 | H |
| HETATM | 101 | C | MOL | A | 1 | 8.076  | 4.238  | -1.884 | 1.00 | 0.00 | C |
| HETATM | 102 | H | MOL | A | 1 | 9.119  | 4.334  | -2.189 | 1.00 | 0.00 | H |
| HETATM | 103 | H | MOL | A | 1 | 7.802  | 3.192  | -2.007 | 1.00 | 0.00 | H |

|        |     |   |     |   |   |        |        |        |      |      |   |
|--------|-----|---|-----|---|---|--------|--------|--------|------|------|---|
| HETATM | 104 | S | MOL | A | 1 | 7.052  | 5.198  | -3.038 | 1.00 | 0.00 | S |
| HETATM | 105 | C | MOL | A | 1 | 5.386  | 4.696  | -2.526 | 1.00 | 0.00 | C |
| HETATM | 106 | H | MOL | A | 1 | 5.155  | 5.133  | -1.555 | 1.00 | 0.00 | H |
| HETATM | 107 | H | MOL | A | 1 | 4.660  | 5.053  | -3.257 | 1.00 | 0.00 | H |
| HETATM | 108 | H | MOL | A | 1 | 5.323  | 3.610  | -2.461 | 1.00 | 0.00 | H |
| HETATM | 109 | C | MOL | A | 1 | 8.435  | 7.097  | -0.770 | 1.00 | 0.00 | C |
| HETATM | 110 | O | MOL | A | 1 | 9.193  | 7.491  | -1.650 | 1.00 | 0.00 | O |
| HETATM | 111 | N | MOL | A | 1 | 7.362  | 7.804  | -0.398 | 1.00 | 0.00 | N |
| HETATM | 112 | H | MOL | A | 1 | 6.762  | 7.435  | 0.332  | 1.00 | 0.00 | H |
| HETATM | 113 | C | MOL | A | 1 | 7.022  | 9.099  | -1.012 | 1.00 | 0.00 | C |
| HETATM | 114 | H | MOL | A | 1 | 6.894  | 8.954  | -2.084 | 1.00 | 0.00 | H |
| HETATM | 115 | C | MOL | A | 1 | 5.708  | 9.639  | -0.424 | 1.00 | 0.00 | C |
| HETATM | 116 | H | MOL | A | 1 | 5.871  | 9.847  | 0.634  | 1.00 | 0.00 | H |
| HETATM | 117 | H | MOL | A | 1 | 5.502  | 10.597 | -0.903 | 1.00 | 0.00 | H |
| HETATM | 118 | C | MOL | A | 1 | 4.446  | 8.798  | -0.556 | 1.00 | 0.00 | C |
| HETATM | 119 | C | MOL | A | 1 | 3.422  | 8.971  | 0.397  | 1.00 | 0.00 | C |
| HETATM | 120 | H | MOL | A | 1 | 3.571  | 9.648  | 1.227  | 1.00 | 0.00 | H |
| HETATM | 121 | C | MOL | A | 1 | 2.198  | 8.291  | 0.262  | 1.00 | 0.00 | C |
| HETATM | 122 | H | MOL | A | 1 | 1.417  | 8.423  | 0.995  | 1.00 | 0.00 | H |
| HETATM | 123 | C | MOL | A | 1 | 1.985  | 7.439  | -0.843 | 1.00 | 0.00 | C |
| HETATM | 124 | O | MOL | A | 1 | 0.767  | 6.865  | -1.023 | 1.00 | 0.00 | O |
| HETATM | 125 | H | MOL | A | 1 | 0.068  | 7.483  | -0.767 | 1.00 | 0.00 | H |
| HETATM | 126 | C | MOL | A | 1 | 3.010  | 7.248  | -1.790 | 1.00 | 0.00 | C |
| HETATM | 127 | H | MOL | A | 1 | 2.832  | 6.600  | -2.636 | 1.00 | 0.00 | H |
| HETATM | 128 | C | MOL | A | 1 | 4.238  | 7.927  | -1.648 | 1.00 | 0.00 | C |
| HETATM | 129 | H | MOL | A | 1 | 5.008  | 7.792  | -2.395 | 1.00 | 0.00 | H |
| HETATM | 130 | C | MOL | A | 1 | 8.123  | 10.168 | -0.840 | 1.00 | 0.00 | C |
| HETATM | 131 | O | MOL | A | 1 | 8.376  | 10.941 | -1.760 | 1.00 | 0.00 | O |
| HETATM | 132 | N | MOL | A | 1 | 10.723 | -0.334 | 1.845  | 1.00 | 0.00 | N |
| HETATM | 133 | H | MOL | A | 1 | 11.072 | 0.397  | 1.232  | 1.00 | 0.00 | H |
| HETATM | 134 | C | MOL | A | 1 | 9.276  | -0.417 | 2.053  | 1.00 | 0.00 | C |
| HETATM | 135 | H | MOL | A | 1 | 9.111  | -0.474 | 3.136  | 1.00 | 0.00 | H |
| HETATM | 136 | C | MOL | A | 1 | 8.636  | 0.894  | 1.546  | 1.00 | 0.00 | C |
| HETATM | 137 | H | MOL | A | 1 | 8.953  | 1.716  | 2.189  | 1.00 | 0.00 | H |
| HETATM | 138 | H | MOL | A | 1 | 9.029  | 1.101  | 0.548  | 1.00 | 0.00 | H |
| HETATM | 139 | C | MOL | A | 1 | 7.113  | 0.902  | 1.464  | 1.00 | 0.00 | C |
| HETATM | 140 | C | MOL | A | 1 | 6.325  | 0.458  | 2.545  | 1.00 | 0.00 | C |
| HETATM | 141 | H | MOL | A | 1 | 6.796  | 0.105  | 3.448  | 1.00 | 0.00 | H |
| HETATM | 142 | C | MOL | A | 1 | 4.924  | 0.406  | 2.435  | 1.00 | 0.00 | C |
| HETATM | 143 | H | MOL | A | 1 | 4.329  | 0.023  | 3.251  | 1.00 | 0.00 | H |
| HETATM | 144 | C | MOL | A | 1 | 4.299  | 0.807  | 1.244  | 1.00 | 0.00 | C |
| HETATM | 145 | H | MOL | A | 1 | 3.224  | 0.738  | 1.144  | 1.00 | 0.00 | H |
| HETATM | 146 | C | MOL | A | 1 | 5.076  | 1.274  | 0.171  | 1.00 | 0.00 | C |
| HETATM | 147 | H | MOL | A | 1 | 4.595  | 1.579  | -0.748 | 1.00 | 0.00 | H |
| HETATM | 148 | C | MOL | A | 1 | 6.476  | 1.313  | 0.277  | 1.00 | 0.00 | C |
| HETATM | 149 | H | MOL | A | 1 | 7.062  | 1.638  | -0.568 | 1.00 | 0.00 | H |
| HETATM | 150 | C | MOL | A | 1 | 8.771  | -1.515 | 1.323  | 1.00 | 0.00 | C |
| HETATM | 151 | O | MOL | A | 1 | 8.027  | -1.985 | 2.268  | 1.00 | 0.00 | O |
| HETATM | 152 | N | MOL | A | 1 | 8.903  | -2.003 | 0.067  | 1.00 | 0.00 | N |
| HETATM | 153 | H | MOL | A | 1 | 9.695  | -1.654 | -0.485 | 1.00 | 0.00 | H |
| HETATM | 154 | C | MOL | A | 1 | 8.321  | -3.306 | -0.347 | 1.00 | 0.00 | C |
| HETATM | 155 | H | MOL | A | 1 | 7.230  | -3.264 | -0.014 | 1.00 | 0.00 | H |
| HETATM | 156 | C | MOL | A | 1 | 8.198  | -3.409 | -1.888 | 1.00 | 0.00 | C |



|        |     |   |     |   |   |         |        |        |      |      |   |
|--------|-----|---|-----|---|---|---------|--------|--------|------|------|---|
| HETATM | 157 | H | MOL | A | 1 | 9.202   | -3.537 | -2.327 | 1.00 | 0.00 | H |
| HETATM | 158 | H | MOL | A | 1 | 7.622   | -4.327 | -2.083 | 1.00 | 0.00 | H |
| HETATM | 159 | C | MOL | A | 1 | 7.505   | -2.183 | -2.494 | 1.00 | 0.00 | C |
| HETATM | 160 | H | MOL | A | 1 | 8.095   | -1.264 | -2.350 | 1.00 | 0.00 | H |
| HETATM | 161 | H | MOL | A | 1 | 7.412   | -2.310 | -3.584 | 1.00 | 0.00 | H |
| HETATM | 162 | C | MOL | A | 1 | 6.108   | -1.942 | -1.928 | 1.00 | 0.00 | C |
| HETATM | 163 | O | MOL | A | 1 | 5.598   | -2.744 | -1.097 | 1.00 | 0.00 | O |
| HETATM | 164 | N | MOL | A | 1 | 5.451   | -0.858 | -2.358 | 1.00 | 0.00 | N |
| HETATM | 165 | H | MOL | A | 1 | 4.454   | -0.664 | -2.059 | 1.00 | 0.00 | H |
| HETATM | 166 | H | MOL | A | 1 | 5.897   | -0.260 | -3.049 | 1.00 | 0.00 | H |
| HETATM | 167 | C | MOL | A | 1 | 8.696   | -4.405 | 0.483  | 1.00 | 0.00 | C |
| HETATM | 168 | O | MOL | A | 1 | 7.860   | -5.214 | 0.881  | 1.00 | 0.00 | O |
| HETATM | 169 | N | MOL | A | 1 | 6.800   | -4.109 | 3.662  | 1.00 | 0.00 | N |
| HETATM | 170 | H | MOL | A | 1 | 7.378   | -3.542 | 3.050  | 1.00 | 0.00 | H |
| HETATM | 171 | C | MOL | A | 1 | 5.388   | -4.248 | 3.311  | 1.00 | 0.00 | C |
| HETATM | 172 | H | MOL | A | 1 | 4.795   | -3.811 | 4.108  | 1.00 | 0.00 | H |
| HETATM | 173 | C | MOL | A | 1 | 5.089   | -3.443 | 2.048  | 1.00 | 0.00 | C |
| HETATM | 174 | H | MOL | A | 1 | 5.627   | -3.869 | 1.214  | 1.00 | 0.00 | H |
| HETATM | 175 | H | MOL | A | 1 | 4.025   | -3.485 | 1.822  | 1.00 | 0.00 | H |
| HETATM | 176 | H | MOL | A | 1 | 5.379   | -2.401 | 2.181  | 1.00 | 0.00 | H |
| HETATM | 177 | C | MOL | A | 1 | 4.960   | -5.718 | 3.165  | 1.00 | 0.00 | C |
| HETATM | 178 | O | MOL | A | 1 | 3.862   | -6.047 | 3.592  | 1.00 | 0.00 | O |
| HETATM | 179 | N | MOL | A | 1 | 2.299   | -6.978 | 5.638  | 1.00 | 0.00 | N |
| HETATM | 180 | H | MOL | A | 1 | 3.152   | -6.991 | 5.085  | 1.00 | 0.00 | H |
| HETATM | 181 | C | MOL | A | 1 | 1.083   | -7.540 | 5.019  | 1.00 | 0.00 | C |
| HETATM | 182 | H | MOL | A | 1 | 0.250   | -6.868 | 5.215  | 1.00 | 0.00 | H |
| HETATM | 183 | C | MOL | A | 1 | 1.233   | -7.700 | 3.490  | 1.00 | 0.00 | C |
| HETATM | 184 | H | MOL | A | 1 | 1.271   | -6.708 | 3.039  | 1.00 | 0.00 | H |
| HETATM | 185 | H | MOL | A | 1 | 2.163   | -8.217 | 3.256  | 1.00 | 0.00 | H |
| HETATM | 186 | C | MOL | A | 1 | 0.064   | -8.503 | 2.881  | 1.00 | 0.00 | C |
| HETATM | 187 | H | MOL | A | 1 | 0.095   | -9.527 | 3.256  | 1.00 | 0.00 | H |
| HETATM | 188 | H | MOL | A | 1 | -0.882  | -8.068 | 3.192  | 1.00 | 0.00 | H |
| HETATM | 189 | C | MOL | A | 1 | 0.092   | -8.605 | 1.357  | 1.00 | 0.00 | C |
| HETATM | 190 | H | MOL | A | 1 | 1.014   | -9.109 | 1.072  | 1.00 | 0.00 | H |
| HETATM | 191 | H | MOL | A | 1 | -0.748  | -9.218 | 1.028  | 1.00 | 0.00 | H |
| HETATM | 192 | N | MOL | A | 1 | 0.065   | -7.304 | 0.678  | 1.00 | 0.00 | N |
| HETATM | 193 | H | MOL | A | 1 | 0.971   | -6.999 | 0.311  | 1.00 | 0.00 | H |
| HETATM | 194 | C | MOL | A | 1 | -0.970  | -6.545 | 0.388  | 1.00 | 0.00 | C |
| HETATM | 195 | N | MOL | A | 1 | -2.171  | -6.804 | 0.830  | 1.00 | 0.00 | N |
| HETATM | 196 | H | MOL | A | 1 | -2.311  | -7.601 | 1.432  | 1.00 | 0.00 | H |
| HETATM | 197 | H | MOL | A | 1 | -2.954  | -6.226 | 0.581  | 1.00 | 0.00 | H |
| HETATM | 198 | N | MOL | A | 1 | -0.807  | -5.495 | -0.356 | 1.00 | 0.00 | N |
| HETATM | 199 | H | MOL | A | 1 | 0.129   | -5.361 | -0.758 | 1.00 | 0.00 | H |
| HETATM | 200 | H | MOL | A | 1 | -1.568  | -4.899 | -0.612 | 1.00 | 0.00 | H |
| HETATM | 201 | C | MOL | A | 1 | 0.727   | -8.868 | 5.661  | 1.00 | 0.00 | C |
| HETATM | 202 | O | MOL | A | 1 | -0.426  | -9.060 | 6.023  | 1.00 | 0.00 | O |
| HETATM | 203 | N | MOL | A | 1 | -12.032 | 6.951  | 1.769  | 1.00 | 0.00 | N |
| HETATM | 204 | H | MOL | A | 1 | -12.464 | 6.317  | 1.110  | 1.00 | 0.00 | H |
| HETATM | 205 | C | MOL | A | 1 | -10.928 | 6.474  | 2.627  | 1.00 | 0.00 | C |
| HETATM | 206 | H | MOL | A | 1 | -11.274 | 6.549  | 3.659  | 1.00 | 0.00 | H |
| HETATM | 207 | C | MOL | A | 1 | -10.591 | 4.998  | 2.359  | 1.00 | 0.00 | C |
| HETATM | 208 | H | MOL | A | 1 | -11.458 | 4.383  | 2.606  | 1.00 | 0.00 | H |
| HETATM | 209 | H | MOL | A | 1 | -10.327 | 4.852  | 1.311  | 1.00 | 0.00 | H |

|        |     |   |     |   |   |         |        |        |      |      |   |
|--------|-----|---|-----|---|---|---------|--------|--------|------|------|---|
| HETATM | 210 | C | MOL | A | 1 | -9.401  | 4.607  | 3.247  | 1.00 | 0.00 | C |
| HETATM | 211 | H | MOL | A | 1 | -8.491  | 5.034  | 2.823  | 1.00 | 0.00 | H |
| HETATM | 212 | H | MOL | A | 1 | -9.555  | 5.028  | 4.243  | 1.00 | 0.00 | H |
| HETATM | 213 | C | MOL | A | 1 | -9.176  | 3.111  | 3.417  | 1.00 | 0.00 | C |
| HETATM | 214 | H | MOL | A | 1 | -10.102 | 2.654  | 3.768  | 1.00 | 0.00 | H |
| HETATM | 215 | H | MOL | A | 1 | -8.879  | 2.678  | 2.460  | 1.00 | 0.00 | H |
| HETATM | 216 | N | MOL | A | 1 | -8.116  | 2.906  | 4.412  | 1.00 | 0.00 | N |
| HETATM | 217 | H | MOL | A | 1 | -7.588  | 3.739  | 4.682  | 1.00 | 0.00 | H |
| HETATM | 218 | C | MOL | A | 1 | -7.788  | 1.794  | 5.033  | 1.00 | 0.00 | C |
| HETATM | 219 | N | MOL | A | 1 | -8.382  | 0.656  | 4.828  | 1.00 | 0.00 | N |
| HETATM | 220 | H | MOL | A | 1 | -9.125  | 0.594  | 4.144  | 1.00 | 0.00 | H |
| HETATM | 221 | H | MOL | A | 1 | -8.031  | -0.150 | 5.325  | 1.00 | 0.00 | H |
| HETATM | 222 | N | MOL | A | 1 | -6.839  | 1.790  | 5.911  | 1.00 | 0.00 | N |
| HETATM | 223 | H | MOL | A | 1 | -6.306  | 2.652  | 6.058  | 1.00 | 0.00 | H |
| HETATM | 224 | H | MOL | A | 1 | -6.595  | 0.918  | 6.357  | 1.00 | 0.00 | H |
| HETATM | 225 | C | MOL | A | 1 | -9.690  | 7.371  | 2.503  | 1.00 | 0.00 | C |
| HETATM | 226 | O | MOL | A | 1 | -9.100  | 7.457  | 1.425  | 1.00 | 0.00 | O |
| HETATM | 227 | N | MOL | A | 1 | -6.121  | 6.688  | 0.739  | 1.00 | 0.00 | N |
| HETATM | 228 | H | MOL | A | 1 | -6.976  | 6.800  | 1.266  | 1.00 | 0.00 | H |
| HETATM | 229 | C | MOL | A | 1 | -6.226  | 6.494  | -0.716 | 1.00 | 0.00 | C |
| HETATM | 230 | H | MOL | A | 1 | -5.279  | 6.114  | -1.100 | 1.00 | 0.00 | H |
| HETATM | 231 | C | MOL | A | 1 | -7.298  | 5.430  | -1.039 | 1.00 | 0.00 | C |
| HETATM | 232 | H | MOL | A | 1 | -8.237  | 5.711  | -0.560 | 1.00 | 0.00 | H |
| HETATM | 233 | H | MOL | A | 1 | -7.456  | 5.411  | -2.117 | 1.00 | 0.00 | H |
| HETATM | 234 | C | MOL | A | 1 | -6.887  | 4.009  | -0.596 | 1.00 | 0.00 | C |
| HETATM | 235 | H | MOL | A | 1 | -5.943  | 3.755  | -1.080 | 1.00 | 0.00 | H |
| HETATM | 236 | H | MOL | A | 1 | -6.732  | 4.005  | 0.485  | 1.00 | 0.00 | H |
| HETATM | 237 | C | MOL | A | 1 | -7.930  | 2.929  | -0.935 | 1.00 | 0.00 | C |
| HETATM | 238 | O | MOL | A | 1 | -9.148  | 3.221  | -0.891 | 1.00 | 0.00 | O |
| HETATM | 239 | O | MOL | A | 1 | -7.572  | 1.740  | -1.154 | 1.00 | 0.00 | O |
| HETATM | 240 | C | MOL | A | 1 | -6.480  | 7.825  | -1.464 | 1.00 | 0.00 | C |
| HETATM | 241 | O | MOL | A | 1 | -6.151  | 7.922  | -2.646 | 1.00 | 0.00 | O |
| HETATM | 242 | O | MOL | A | 1 | 2.544   | 1.608  | -2.298 | 1.00 | 0.00 | O |
| HETATM | 243 | C | MOL | A | 1 | 1.991   | 0.510  | -2.053 | 1.00 | 0.00 | C |
| HETATM | 244 | N | MOL | A | 1 | 2.687   | -0.613 | -1.738 | 1.00 | 0.00 | N |
| HETATM | 245 | C | MOL | A | 1 | 2.062   | -1.808 | -1.567 | 1.00 | 0.00 | C |
| HETATM | 246 | N | MOL | A | 1 | 2.791   | -2.877 | -1.257 | 1.00 | 0.00 | N |
| HETATM | 247 | H | MOL | A | 1 | 2.404   | -3.850 | -1.270 | 1.00 | 0.00 | H |
| HETATM | 248 | H | MOL | A | 1 | 3.808   | -2.754 | -1.126 | 1.00 | 0.00 | H |
| HETATM | 249 | C | MOL | A | 1 | 0.631   | -1.923 | -1.709 | 1.00 | 0.00 | C |
| HETATM | 250 | H | MOL | A | 1 | 0.137   | -2.893 | -1.674 | 1.00 | 0.00 | H |
| HETATM | 251 | C | MOL | A | 1 | -0.066  | -0.776 | -1.943 | 1.00 | 0.00 | C |
| HETATM | 252 | H | MOL | A | 1 | -1.146  | -0.753 | -2.101 | 1.00 | 0.00 | H |
| HETATM | 253 | N | MOL | A | 1 | 0.563   | 0.438  | -2.052 | 1.00 | 0.00 | N |
| HETATM | 254 | C | MOL | A | 1 | -0.187  | 1.693  | -2.353 | 1.00 | 0.00 | C |
| HETATM | 255 | O | MOL | A | 1 | -1.576  | 1.427  | -2.492 | 1.00 | 0.00 | O |
| HETATM | 256 | H | MOL | A | 1 | 0.191   | 2.107  | -3.303 | 1.00 | 0.00 | H |
| HETATM | 257 | C | MOL | A | 1 | 0.000   | 2.710  | -1.227 | 1.00 | 0.00 | C |
| HETATM | 258 | H | MOL | A | 1 | 1.029   | 2.684  | -0.855 | 1.00 | 0.00 | H |
| HETATM | 259 | H | MOL | A | 1 | -0.242  | 3.724  | -1.583 | 1.00 | 0.00 | H |
| HETATM | 260 | S | MOL | A | 1 | -1.179  | 2.143  | 0.045  | 1.00 | 0.00 | S |
| HETATM | 261 | C | MOL | A | 1 | -2.359  | 1.795  | -1.343 | 1.00 | 0.00 | C |
| HETATM | 262 | H | MOL | A | 1 | -2.925  | 2.721  | -1.558 | 1.00 | 0.00 | H |

|        |     |   |     |   |   |        |        |        |      |      |   |
|--------|-----|---|-----|---|---|--------|--------|--------|------|------|---|
| HETATM | 263 | C | MOL | A | 1 | -3.344 | 0.708  | -0.945 | 1.00 | 0.00 | C |
| HETATM | 264 | H | MOL | A | 1 | -3.715 | 0.908  | 0.071  | 1.00 | 0.00 | H |
| HETATM | 265 | H | MOL | A | 1 | -2.851 | -0.281 | -0.956 | 1.00 | 0.00 | H |
| HETATM | 266 | O | MOL | A | 1 | -4.492 | 0.700  | -1.846 | 1.00 | 0.00 | O |
| HETATM | 267 | H | MOL | A | 1 | -5.261 | 0.694  | -1.221 | 1.00 | 0.00 | H |
| HETATM | 268 | C | MOL | A | 1 | -6.359 | -6.903 | 0.247  | 1.00 | 0.00 | C |
| HETATM | 269 | O | MOL | A | 1 | -5.611 | -6.598 | 1.260  | 1.00 | 0.00 | O |
| HETATM | 270 | N | MOL | A | 1 | -6.020 | -6.763 | -1.088 | 1.00 | 0.00 | N |
| HETATM | 271 | H | MOL | A | 1 | -6.728 | -7.228 | -1.682 | 1.00 | 0.00 | H |
| HETATM | 272 | C | MOL | A | 1 | -4.606 | -7.247 | -1.575 | 1.00 | 0.00 | C |
| HETATM | 273 | H | MOL | A | 1 | -4.875 | -7.878 | -2.507 | 1.00 | 0.00 | H |
| HETATM | 274 | C | MOL | A | 1 | -3.737 | -6.052 | -1.961 | 1.00 | 0.00 | C |
| HETATM | 275 | H | MOL | A | 1 | -3.667 | -5.430 | -1.056 | 1.00 | 0.00 | H |
| HETATM | 276 | H | MOL | A | 1 | -2.722 | -6.404 | -2.208 | 1.00 | 0.00 | H |
| HETATM | 277 | C | MOL | A | 1 | -4.311 | -5.251 | -3.133 | 1.00 | 0.00 | C |
| HETATM | 278 | H | MOL | A | 1 | -4.708 | -5.936 | -3.900 | 1.00 | 0.00 | H |
| HETATM | 279 | H | MOL | A | 1 | -5.171 | -4.640 | -2.802 | 1.00 | 0.00 | H |
| HETATM | 280 | C | MOL | A | 1 | -3.224 | -4.381 | -3.777 | 1.00 | 0.00 | C |
| HETATM | 281 | H | MOL | A | 1 | -2.725 | -3.735 | -3.037 | 1.00 | 0.00 | H |
| HETATM | 282 | H | MOL | A | 1 | -2.413 | -4.990 | -4.220 | 1.00 | 0.00 | H |
| HETATM | 283 | N | MOL | A | 1 | -3.793 | -3.519 | -4.825 | 1.00 | 0.00 | N |
| HETATM | 284 | H | MOL | A | 1 | -4.112 | -4.015 | -5.668 | 1.00 | 0.00 | H |
| HETATM | 285 | C | MOL | A | 1 | -4.275 | -2.284 | -4.621 | 1.00 | 0.00 | C |
| HETATM | 286 | N | MOL | A | 1 | -4.169 | -1.676 | -3.431 | 1.00 | 0.00 | N |
| HETATM | 287 | H | MOL | A | 1 | -4.095 | -2.274 | -2.585 | 1.00 | 0.00 | H |
| HETATM | 288 | H | MOL | A | 1 | -4.427 | -0.713 | -3.158 | 1.00 | 0.00 | H |
| HETATM | 289 | N | MOL | A | 1 | -4.730 | -1.559 | -5.680 | 1.00 | 0.00 | N |
| HETATM | 290 | H | MOL | A | 1 | -4.843 | -2.104 | -6.552 | 1.00 | 0.00 | H |
| HETATM | 291 | H | MOL | A | 1 | -5.542 | -0.972 | -5.504 | 1.00 | 0.00 | H |
| HETATM | 292 | C | MOL | A | 1 | -4.166 | -8.503 | -1.157 | 1.00 | 0.00 | C |
| HETATM | 293 | O | MOL | A | 1 | -4.634 | -9.058 | -0.162 | 1.00 | 0.00 | O |
| HETATM | 294 | C | MOL | A | 1 | 0.373  | -6.945 | -4.479 | 1.00 | 0.00 | C |
| HETATM | 295 | O | MOL | A | 1 | -0.089 | -5.729 | -4.413 | 1.00 | 0.00 | O |
| HETATM | 296 | N | MOL | A | 1 | 1.468  | -7.368 | -3.700 | 1.00 | 0.00 | N |
| HETATM | 297 | H | MOL | A | 1 | 1.699  | -8.352 | -3.893 | 1.00 | 0.00 | H |
| HETATM | 298 | C | MOL | A | 1 | 2.700  | -6.510 | -3.692 | 1.00 | 0.00 | C |
| HETATM | 299 | H | MOL | A | 1 | 2.333  | -5.461 | -3.655 | 1.00 | 0.00 | H |
| HETATM | 300 | C | MOL | A | 1 | 3.497  | -6.781 | -2.380 | 1.00 | 0.00 | C |
| HETATM | 301 | H | MOL | A | 1 | 3.756  | -7.840 | -2.269 | 1.00 | 0.00 | H |
| HETATM | 302 | H | MOL | A | 1 | 4.430  | -6.197 | -2.322 | 1.00 | 0.00 | H |
| HETATM | 303 | C | MOL | A | 1 | 2.573  | -6.398 | -1.127 | 1.00 | 0.00 | C |
| HETATM | 304 | O | MOL | A | 1 | 1.793  | -5.397 | -1.213 | 1.00 | 0.00 | O |
| HETATM | 305 | O | MOL | A | 1 | 2.732  | -7.168 | -0.161 | 1.00 | 0.00 | O |
| HETATM | 306 | C | MOL | A | 1 | 3.540  | -6.920 | -4.771 | 1.00 | 0.00 | C |
| HETATM | 307 | O | MOL | A | 1 | 3.853  | -6.073 | -5.606 | 1.00 | 0.00 | O |
| HETATM | 308 | N | MOL | A | 1 | 3.053  | -3.516 | -6.910 | 1.00 | 0.00 | N |
| HETATM | 309 | H | MOL | A | 1 | 2.336  | -3.942 | -6.343 | 1.00 | 0.00 | H |
| HETATM | 310 | C | MOL | A | 1 | 3.802  | -2.391 | -6.344 | 1.00 | 0.00 | C |
| HETATM | 311 | H | MOL | A | 1 | 3.707  | -1.535 | -7.014 | 1.00 | 0.00 | H |
| HETATM | 312 | C | MOL | A | 1 | 3.206  | -2.002 | -4.992 | 1.00 | 0.00 | C |
| HETATM | 313 | H | MOL | A | 1 | 3.248  | -2.859 | -4.317 | 1.00 | 0.00 | H |
| HETATM | 314 | H | MOL | A | 1 | 3.822  | -1.215 | -4.557 | 1.00 | 0.00 | H |
| HETATM | 315 | C | MOL | A | 1 | 1.786  | -1.489 | -5.071 | 1.00 | 0.00 | C |

|        |     |   |       |   |         |        |        |      |      |   |
|--------|-----|---|-------|---|---------|--------|--------|------|------|---|
| HETATM | 316 | C | MOL A | 1 | 0.708   | -2.358 | -4.832 | 1.00 | 0.00 | C |
| HETATM | 317 | H | MOL A | 1 | 0.889   | -3.397 | -4.599 | 1.00 | 0.00 | H |
| HETATM | 318 | C | MOL A | 1 | -0.603  | -1.859 | -4.823 | 1.00 | 0.00 | C |
| HETATM | 319 | H | MOL A | 1 | -1.412  | -2.523 | -4.579 | 1.00 | 0.00 | H |
| HETATM | 320 | C | MOL A | 1 | -0.844  | -0.493 | -5.048 | 1.00 | 0.00 | C |
| HETATM | 321 | H | MOL A | 1 | -1.848  | -0.097 | -4.976 | 1.00 | 0.00 | H |
| HETATM | 322 | C | MOL A | 1 | 0.229   | 0.366  | -5.337 | 1.00 | 0.00 | C |
| HETATM | 323 | H | MOL A | 1 | 0.052   | 1.419  | -5.512 | 1.00 | 0.00 | H |
| HETATM | 324 | C | MOL A | 1 | 1.544   | -0.130 | -5.345 | 1.00 | 0.00 | C |
| HETATM | 325 | H | MOL A | 1 | 2.370   | 0.543  | -5.530 | 1.00 | 0.00 | H |
| HETATM | 326 | C | MOL A | 1 | 5.298   | -2.669 | -6.193 | 1.00 | 0.00 | C |
| HETATM | 327 | O | MOL A | 1 | 6.093   | -1.758 | -6.384 | 1.00 | 0.00 | O |
| HETATM | 328 | O | MOL A | 1 | 1.655   | 3.560  | -4.141 | 1.00 | 0.00 | O |
| HETATM | 329 | H | MOL A | 1 | 2.207   | 3.647  | -4.949 | 1.00 | 0.00 | H |
| HETATM | 330 | H | MOL A | 1 | 2.146   | 2.914  | -3.581 | 1.00 | 0.00 | H |
| HETATM | 331 | O | MOL A | 1 | -3.674  | 4.093  | 0.465  | 1.00 | 0.00 | O |
| HETATM | 332 | H | MOL A | 1 | -3.691  | 5.079  | 0.480  | 1.00 | 0.00 | H |
| HETATM | 333 | H | MOL A | 1 | -2.717  | 3.888  | 0.512  | 1.00 | 0.00 | H |
| HETATM | 334 | O | MOL A | 1 | -5.705  | 0.313  | 0.864  | 1.00 | 0.00 | O |
| HETATM | 335 | H | MOL A | 1 | -6.674  | 0.513  | 0.881  | 1.00 | 0.00 | H |
| HETATM | 336 | H | MOL A | 1 | -5.741  | -0.508 | 0.271  | 1.00 | 0.00 | H |
| HETATM | 337 | O | MOL A | 1 | -10.965 | -0.650 | -0.813 | 1.00 | 0.00 | O |
| HETATM | 338 | H | MOL A | 1 | -10.323 | 0.087  | -0.727 | 1.00 | 0.00 | H |
| HETATM | 339 | H | MOL A | 1 | -10.591 | -1.253 | -0.130 | 1.00 | 0.00 | H |
| HETATM | 340 | O | MOL A | 1 | -8.556  | 0.419  | 0.772  | 1.00 | 0.00 | O |
| HETATM | 341 | H | MOL A | 1 | -8.198  | 0.975  | -0.017 | 1.00 | 0.00 | H |
| HETATM | 342 | H | MOL A | 1 | -8.413  | -0.484 | 0.331  | 1.00 | 0.00 | H |
| HETATM | 343 | O | MOL A | 1 | 5.841   | -5.688 | -0.631 | 1.00 | 0.00 | O |
| HETATM | 344 | H | MOL A | 1 | 5.696   | -4.739 | -0.849 | 1.00 | 0.00 | H |
| HETATM | 345 | H | MOL A | 1 | 6.707   | -5.583 | -0.106 | 1.00 | 0.00 | H |
| HETATM | 346 | O | MOL A | 1 | -8.471  | -1.913 | -0.648 | 1.00 | 0.00 | O |
| HETATM | 347 | H | MOL A | 1 | -8.379  | -1.380 | -1.478 | 1.00 | 0.00 | H |
| HETATM | 348 | H | MOL A | 1 | -7.475  | -2.074 | -0.512 | 1.00 | 0.00 | H |
| HETATM | 349 | O | MOL A | 1 | -7.329  | -0.326 | -2.697 | 1.00 | 0.00 | O |
| HETATM | 350 | H | MOL A | 1 | -7.388  | 0.512  | -2.124 | 1.00 | 0.00 | H |
| HETATM | 351 | H | MOL A | 1 | -6.598  | -0.767 | -2.168 | 1.00 | 0.00 | H |
| HETATM | 352 | H | MOL A | 1 | 8.671   | 10.235 | 0.088  | 1.00 | 0.00 | H |
| HETATM | 353 | H | MOL A | 1 | 9.452   | 6.614  | 1.891  | 1.00 | 0.00 | H |
| HETATM | 354 | H | MOL A | 1 | 5.043   | 6.637  | 3.370  | 1.00 | 0.00 | H |
| HETATM | 355 | H | MOL A | 1 | 6.226   | 3.821  | 4.380  | 1.00 | 0.00 | H |
| HETATM | 356 | H | MOL A | 1 | 11.346  | -0.976 | 2.292  | 1.00 | 0.00 | H |
| HETATM | 357 | H | MOL A | 1 | 9.731   | -4.528 | 0.766  | 1.00 | 0.00 | H |
| HETATM | 358 | H | MOL A | 1 | -2.942  | 0.786  | 6.690  | 1.00 | 0.00 | H |
| HETATM | 359 | H | MOL A | 1 | -2.155  | -1.722 | 5.210  | 1.00 | 0.00 | H |
| HETATM | 360 | H | MOL A | 1 | 1.325   | -0.208 | 8.377  | 1.00 | 0.00 | H |
| HETATM | 361 | H | MOL A | 1 | 1.310   | 3.226  | 7.303  | 1.00 | 0.00 | H |
| HETATM | 362 | H | MOL A | 1 | -12.350 | 7.896  | 1.840  | 1.00 | 0.00 | H |
| HETATM | 363 | H | MOL A | 1 | -9.335  | 7.925  | 3.360  | 1.00 | 0.00 | H |
| HETATM | 364 | H | MOL A | 1 | -6.940  | 8.659  | -0.954 | 1.00 | 0.00 | H |
| HETATM | 365 | H | MOL A | 1 | -5.229  | 6.708  | 1.192  | 1.00 | 0.00 | H |
| HETATM | 366 | H | MOL A | 1 | -8.848  | 1.316  | -5.014 | 1.00 | 0.00 | H |
| HETATM | 367 | H | MOL A | 1 | -6.577  | 0.003  | -7.286 | 1.00 | 0.00 | H |
| HETATM | 368 | H | MOL A | 1 | -3.393  | -9.003 | -1.721 | 1.00 | 0.00 | H |

|        |     |   |       |   |        |        |        |      |      |   |
|--------|-----|---|-------|---|--------|--------|--------|------|------|---|
| HETATM | 369 | H | MOL A | 1 | -7.339 | -7.303 | 0.465  | 1.00 | 0.00 | H |
| HETATM | 370 | H | MOL A | 1 | -0.096 | -7.649 | -5.151 | 1.00 | 0.00 | H |
| HETATM | 371 | H | MOL A | 1 | 3.890  | -7.938 | -4.850 | 1.00 | 0.00 | H |
| HETATM | 372 | H | MOL A | 1 | 3.247  | -3.853 | -7.831 | 1.00 | 0.00 | H |
| HETATM | 373 | H | MOL A | 1 | 5.648  | -3.654 | -5.922 | 1.00 | 0.00 | H |
| HETATM | 374 | H | MOL A | 1 | 5.612  | -6.441 | 2.699  | 1.00 | 0.00 | H |
| HETATM | 375 | H | MOL A | 1 | 7.181  | -4.555 | 4.472  | 1.00 | 0.00 | H |
| HETATM | 376 | H | MOL A | 1 | 2.284  | -6.599 | 6.563  | 1.00 | 0.00 | H |
| HETATM | 377 | H | MOL A | 1 | 1.479  | -9.631 | 5.797  | 1.00 | 0.00 | H |
| HETATM | 378 | H | MOL A | 1 | -7.345 | -4.016 | 5.049  | 1.00 | 0.00 | H |
| HETATM | 379 | H | MOL A | 1 | -3.843 | -3.635 | 4.201  | 1.00 | 0.00 | H |

END

# Model2

| REMARK | Generated by Multiwfn, Totally |   |       |   | 336 atoms |        |        |      |      |   |
|--------|--------------------------------|---|-------|---|-----------|--------|--------|------|------|---|
| HETATM | 1                              | N | MOL A | 1 | -8.760    | 2.304  | -0.217 | 1.00 | 0.00 | N |
| HETATM | 2                              | H | MOL A | 1 | -7.892    | 2.741  | -0.504 | 1.00 | 0.00 | H |
| HETATM | 3                              | H | MOL A | 1 | -9.425    | 3.039  | 0.017  | 1.00 | 0.00 | H |
| HETATM | 4                              | H | MOL A | 1 | -9.149    | 1.798  | -1.006 | 1.00 | 0.00 | H |
| HETATM | 5                              | C | MOL A | 1 | -8.558    | 1.362  | 0.907  | 1.00 | 0.00 | C |
| HETATM | 6                              | H | MOL A | 1 | -9.507    | 0.849  | 1.073  | 1.00 | 0.00 | H |
| HETATM | 7                              | C | MOL A | 1 | -7.502    | 0.293  | 0.559  | 1.00 | 0.00 | C |
| HETATM | 8                              | H | MOL A | 1 | -7.529    | -0.503 | 1.299  | 1.00 | 0.00 | H |
| HETATM | 9                              | H | MOL A | 1 | -7.800    | -0.169 | -0.375 | 1.00 | 0.00 | H |
| HETATM | 10                             | C | MOL A | 1 | -6.052    | 0.787  | 0.431  | 1.00 | 0.00 | C |
| HETATM | 11                             | H | MOL A | 1 | -6.038    | 1.873  | 0.362  | 1.00 | 0.00 | H |
| HETATM | 12                             | H | MOL A | 1 | -5.493    | 0.522  | 1.328  | 1.00 | 0.00 | H |
| HETATM | 13                             | C | MOL A | 1 | -5.392    | 0.198  | -0.821 | 1.00 | 0.00 | C |
| HETATM | 14                             | O | MOL A | 1 | -4.360    | -0.492 | -0.700 | 1.00 | 0.00 | O |
| HETATM | 15                             | O | MOL A | 1 | -5.945    | 0.411  | -1.926 | 1.00 | 0.00 | O |
| HETATM | 16                             | C | MOL A | 1 | -8.193    | 2.110  | 2.189  | 1.00 | 0.00 | C |
| HETATM | 17                             | O | MOL A | 1 | -7.921    | 3.304  | 2.111  | 1.00 | 0.00 | O |
| HETATM | 18                             | N | MOL A | 1 | -5.637    | 3.005  | 3.631  | 1.00 | 0.00 | N |
| HETATM | 19                             | H | MOL A | 1 | -6.236    | 3.169  | 2.830  | 1.00 | 0.00 | H |
| HETATM | 20                             | C | MOL A | 1 | -4.236    | 3.449  | 3.512  | 1.00 | 0.00 | C |
| HETATM | 21                             | H | MOL A | 1 | -3.598    | 2.608  | 3.789  | 1.00 | 0.00 | H |
| HETATM | 22                             | C | MOL A | 1 | -3.909    | 3.792  | 2.043  | 1.00 | 0.00 | C |
| HETATM | 23                             | H | MOL A | 1 | -4.115    | 2.909  | 1.438  | 1.00 | 0.00 | H |
| HETATM | 24                             | C | MOL A | 1 | -4.739    | 4.951  | 1.483  | 1.00 | 0.00 | C |
| HETATM | 25                             | H | MOL A | 1 | -4.561    | 5.850  | 2.069  | 1.00 | 0.00 | H |
| HETATM | 26                             | H | MOL A | 1 | -4.447    | 5.148  | 0.452  | 1.00 | 0.00 | H |
| HETATM | 27                             | H | MOL A | 1 | -5.800    | 4.713  | 1.501  | 1.00 | 0.00 | H |
| HETATM | 28                             | C | MOL A | 1 | -2.432    | 4.130  | 1.875  | 1.00 | 0.00 | C |
| HETATM | 29                             | H | MOL A | 1 | -1.829    | 3.310  | 2.256  | 1.00 | 0.00 | H |
| HETATM | 30                             | H | MOL A | 1 | -2.187    | 4.287  | 0.828  | 1.00 | 0.00 | H |
| HETATM | 31                             | H | MOL A | 1 | -2.181    | 5.043  | 2.413  | 1.00 | 0.00 | H |
| HETATM | 32                             | C | MOL A | 1 | -3.869    | 4.591  | 4.472  | 1.00 | 0.00 | C |
| HETATM | 33                             | O | MOL A | 1 | -2.714    | 4.696  | 4.866  | 1.00 | 0.00 | O |
| HETATM | 34                             | N | MOL A | 1 | -1.336    | 3.698  | 7.046  | 1.00 | 0.00 | N |
| HETATM | 35                             | H | MOL A | 1 | -1.972    | 4.211  | 6.447  | 1.00 | 0.00 | H |
| HETATM | 36                             | C | MOL A | 1 | 0.015     | 3.471  | 6.515  | 1.00 | 0.00 | C |
| HETATM | 37                             | H | MOL A | 1 | 0.586     | 2.870  | 7.216  | 1.00 | 0.00 | H |
| HETATM | 38                             | C | MOL A | 1 | -0.051    | 2.730  | 5.168  | 1.00 | 0.00 | C |

|        |    |   |     |   |   |        |        |        |      |      |   |
|--------|----|---|-----|---|---|--------|--------|--------|------|------|---|
| HETATM | 39 | H | MOL | A | 1 | -0.490 | 3.401  | 4.429  | 1.00 | 0.00 | H |
| HETATM | 40 | H | MOL | A | 1 | 0.975  | 2.551  | 4.853  | 1.00 | 0.00 | H |
| HETATM | 41 | C | MOL | A | 1 | -0.759 | 1.414  | 5.043  | 1.00 | 0.00 | C |
| HETATM | 42 | C | MOL | A | 1 | -1.279 | 0.653  | 6.032  | 1.00 | 0.00 | C |
| HETATM | 43 | H | MOL | A | 1 | -1.265 | 0.879  | 7.086  | 1.00 | 0.00 | H |
| HETATM | 44 | N | MOL | A | 1 | -1.801 | -0.505 | 5.504  | 1.00 | 0.00 | N |
| HETATM | 45 | H | MOL | A | 1 | -2.220 | -1.226 | 6.085  | 1.00 | 0.00 | H |
| HETATM | 46 | C | MOL | A | 1 | -1.558 | -0.609 | 4.159  | 1.00 | 0.00 | C |
| HETATM | 47 | C | MOL | A | 1 | -1.769 | -1.627 | 3.223  | 1.00 | 0.00 | C |
| HETATM | 48 | H | MOL | A | 1 | -2.224 | -2.558 | 3.521  | 1.00 | 0.00 | H |
| HETATM | 49 | C | MOL | A | 1 | -1.307 | -1.446 | 1.911  | 1.00 | 0.00 | C |
| HETATM | 50 | H | MOL | A | 1 | -1.373 | -2.251 | 1.196  | 1.00 | 0.00 | H |
| HETATM | 51 | C | MOL | A | 1 | -0.727 | -0.227 | 1.535  | 1.00 | 0.00 | C |
| HETATM | 52 | H | MOL | A | 1 | -0.377 | -0.084 | 0.524  | 1.00 | 0.00 | H |
| HETATM | 53 | C | MOL | A | 1 | -0.563 | 0.802  | 2.475  | 1.00 | 0.00 | C |
| HETATM | 54 | H | MOL | A | 1 | -0.102 | 1.723  | 2.163  | 1.00 | 0.00 | H |
| HETATM | 55 | C | MOL | A | 1 | -0.930 | 0.625  | 3.825  | 1.00 | 0.00 | C |
| HETATM | 56 | C | MOL | A | 1 | 0.824  | 4.753  | 6.279  | 1.00 | 0.00 | C |
| HETATM | 57 | O | MOL | A | 1 | 2.047  | 4.689  | 6.434  | 1.00 | 0.00 | O |
| HETATM | 58 | N | MOL | A | 1 | 4.389  | 4.826  | 4.820  | 1.00 | 0.00 | N |
| HETATM | 59 | H | MOL | A | 1 | 3.507  | 4.931  | 5.312  | 1.00 | 0.00 | H |
| HETATM | 60 | C | MOL | A | 1 | 4.257  | 4.726  | 3.359  | 1.00 | 0.00 | C |
| HETATM | 61 | H | MOL | A | 1 | 4.701  | 3.794  | 3.008  | 1.00 | 0.00 | H |
| HETATM | 62 | C | MOL | A | 1 | 2.748  | 4.687  | 3.100  | 1.00 | 0.00 | C |
| HETATM | 63 | H | MOL | A | 1 | 2.376  | 3.719  | 3.423  | 1.00 | 0.00 | H |
| HETATM | 64 | H | MOL | A | 1 | 2.289  | 5.437  | 3.739  | 1.00 | 0.00 | H |
| HETATM | 65 | C | MOL | A | 1 | 2.234  | 4.974  | 1.683  | 1.00 | 0.00 | C |
| HETATM | 66 | H | MOL | A | 1 | 2.481  | 5.996  | 1.399  | 1.00 | 0.00 | H |
| HETATM | 67 | C | MOL | A | 1 | 2.731  | 4.012  | 0.610  | 1.00 | 0.00 | C |
| HETATM | 68 | H | MOL | A | 1 | 2.504  | 2.982  | 0.878  | 1.00 | 0.00 | H |
| HETATM | 69 | H | MOL | A | 1 | 2.244  | 4.254  | -0.335 | 1.00 | 0.00 | H |
| HETATM | 70 | H | MOL | A | 1 | 3.798  | 4.129  | 0.464  | 1.00 | 0.00 | H |
| HETATM | 71 | C | MOL | A | 1 | 0.725  | 4.833  | 1.776  | 1.00 | 0.00 | C |
| HETATM | 72 | H | MOL | A | 1 | 0.329  | 5.522  | 2.521  | 1.00 | 0.00 | H |
| HETATM | 73 | H | MOL | A | 1 | 0.277  | 5.051  | 0.810  | 1.00 | 0.00 | H |
| HETATM | 74 | H | MOL | A | 1 | 0.465  | 3.819  | 2.054  | 1.00 | 0.00 | H |
| HETATM | 75 | C | MOL | A | 1 | 4.931  | 5.879  | 2.596  | 1.00 | 0.00 | C |
| HETATM | 76 | O | MOL | A | 1 | 5.484  | 5.653  | 1.523  | 1.00 | 0.00 | O |
| HETATM | 77 | N | MOL | A | 1 | 8.115  | 4.367  | 1.530  | 1.00 | 0.00 | N |
| HETATM | 78 | H | MOL | A | 1 | 7.524  | 5.096  | 1.135  | 1.00 | 0.00 | H |
| HETATM | 79 | C | MOL | A | 1 | 7.785  | 2.973  | 1.206  | 1.00 | 0.00 | C |
| HETATM | 80 | H | MOL | A | 1 | 7.551  | 2.449  | 2.134  | 1.00 | 0.00 | H |
| HETATM | 81 | C | MOL | A | 1 | 6.524  | 2.941  | 0.330  | 1.00 | 0.00 | C |
| HETATM | 82 | H | MOL | A | 1 | 5.671  | 3.097  | 0.985  | 1.00 | 0.00 | H |
| HETATM | 83 | H | MOL | A | 1 | 6.563  | 3.747  | -0.404 | 1.00 | 0.00 | H |
| HETATM | 84 | C | MOL | A | 1 | 6.312  | 1.618  | -0.414 | 1.00 | 0.00 | C |
| HETATM | 85 | H | MOL | A | 1 | 7.017  | 1.553  | -1.244 | 1.00 | 0.00 | H |
| HETATM | 86 | H | MOL | A | 1 | 6.516  | 0.796  | 0.271  | 1.00 | 0.00 | H |
| HETATM | 87 | S | MOL | A | 1 | 4.641  | 1.392  | -1.060 | 1.00 | 0.00 | S |
| HETATM | 88 | C | MOL | A | 1 | 4.587  | 2.692  | -2.321 | 1.00 | 0.00 | C |
| HETATM | 89 | H | MOL | A | 1 | 5.391  | 2.534  | -3.036 | 1.00 | 0.00 | H |
| HETATM | 90 | H | MOL | A | 1 | 3.636  | 2.649  | -2.847 | 1.00 | 0.00 | H |
| HETATM | 91 | H | MOL | A | 1 | 4.694  | 3.673  | -1.860 | 1.00 | 0.00 | H |

|        |     |   |     |   |   |        |        |        |      |      |   |
|--------|-----|---|-----|---|---|--------|--------|--------|------|------|---|
| HETATM | 92  | C | MOL | A | 1 | 8.930  | 2.204  | 0.542  | 1.00 | 0.00 | C |
| HETATM | 93  | O | MOL | A | 1 | 9.224  | 1.092  | 0.979  | 1.00 | 0.00 | O |
| HETATM | 94  | N | MOL | A | 1 | 9.569  | 2.781  | -0.477 | 1.00 | 0.00 | N |
| HETATM | 95  | H | MOL | A | 1 | 9.262  | 3.704  | -0.750 | 1.00 | 0.00 | H |
| HETATM | 96  | C | MOL | A | 1 | 10.501 | 2.100  | -1.392 | 1.00 | 0.00 | C |
| HETATM | 97  | H | MOL | A | 1 | 9.989  | 1.217  | -1.774 | 1.00 | 0.00 | H |
| HETATM | 98  | C | MOL | A | 1 | 10.776 | 3.012  | -2.596 | 1.00 | 0.00 | C |
| HETATM | 99  | H | MOL | A | 1 | 11.393 | 3.852  | -2.272 | 1.00 | 0.00 | H |
| HETATM | 100 | H | MOL | A | 1 | 11.341 | 2.453  | -3.343 | 1.00 | 0.00 | H |
| HETATM | 101 | C | MOL | A | 1 | 9.501  | 3.539  | -3.228 | 1.00 | 0.00 | C |
| HETATM | 102 | C | MOL | A | 1 | 9.007  | 4.801  | -2.851 | 1.00 | 0.00 | C |
| HETATM | 103 | H | MOL | A | 1 | 9.564  | 5.422  | -2.163 | 1.00 | 0.00 | H |
| HETATM | 104 | C | MOL | A | 1 | 7.768  | 5.250  | -3.340 | 1.00 | 0.00 | C |
| HETATM | 105 | H | MOL | A | 1 | 7.393  | 6.214  | -3.034 | 1.00 | 0.00 | H |
| HETATM | 106 | C | MOL | A | 1 | 7.009  | 4.438  | -4.209 | 1.00 | 0.00 | C |
| HETATM | 107 | O | MOL | A | 1 | 5.778  | 4.839  | -4.623 | 1.00 | 0.00 | O |
| HETATM | 108 | H | MOL | A | 1 | 5.505  | 5.652  | -4.146 | 1.00 | 0.00 | H |
| HETATM | 109 | C | MOL | A | 1 | 7.514  | 3.180  | -4.604 | 1.00 | 0.00 | C |
| HETATM | 110 | H | MOL | A | 1 | 6.925  | 2.564  | -5.266 | 1.00 | 0.00 | H |
| HETATM | 111 | C | MOL | A | 1 | 8.755  | 2.729  | -4.108 | 1.00 | 0.00 | C |
| HETATM | 112 | H | MOL | A | 1 | 9.125  | 1.751  | -4.380 | 1.00 | 0.00 | H |
| HETATM | 113 | C | MOL | A | 1 | 11.785 | 1.591  | -0.731 | 1.00 | 0.00 | C |
| HETATM | 114 | O | MOL | A | 1 | 12.320 | 2.271  | 0.173  | 1.00 | 0.00 | O |
| HETATM | 115 | O | MOL | A | 1 | 12.143 | 0.423  | -1.002 | 1.00 | 0.00 | O |
| HETATM | 116 | N | MOL | A | 1 | 7.961  | -2.744 | 4.090  | 1.00 | 0.00 | N |
| HETATM | 117 | H | MOL | A | 1 | 8.691  | -2.571 | 3.405  | 1.00 | 0.00 | H |
| HETATM | 118 | C | MOL | A | 1 | 6.642  | -2.166 | 3.838  | 1.00 | 0.00 | C |
| HETATM | 119 | H | MOL | A | 1 | 6.256  | -1.835 | 4.811  | 1.00 | 0.00 | H |
| HETATM | 120 | C | MOL | A | 1 | 6.787  | -0.883 | 3.008  | 1.00 | 0.00 | C |
| HETATM | 121 | H | MOL | A | 1 | 7.529  | -0.232 | 3.473  | 1.00 | 0.00 | H |
| HETATM | 122 | H | MOL | A | 1 | 7.137  | -1.120 | 2.001  | 1.00 | 0.00 | H |
| HETATM | 123 | C | MOL | A | 1 | 5.468  | -0.145 | 2.937  | 1.00 | 0.00 | C |
| HETATM | 124 | C | MOL | A | 1 | 5.074  | 0.675  | 4.012  | 1.00 | 0.00 | C |
| HETATM | 125 | H | MOL | A | 1 | 5.741  | 0.837  | 4.845  | 1.00 | 0.00 | H |
| HETATM | 126 | C | MOL | A | 1 | 3.797  | 1.261  | 4.016  | 1.00 | 0.00 | C |
| HETATM | 127 | H | MOL | A | 1 | 3.480  | 1.883  | 4.838  | 1.00 | 0.00 | H |
| HETATM | 128 | C | MOL | A | 1 | 2.923  | 1.036  | 2.941  | 1.00 | 0.00 | C |
| HETATM | 129 | H | MOL | A | 1 | 1.949  | 1.491  | 2.937  | 1.00 | 0.00 | H |
| HETATM | 130 | C | MOL | A | 1 | 3.316  | 0.229  | 1.863  | 1.00 | 0.00 | C |
| HETATM | 131 | H | MOL | A | 1 | 2.640  | 0.066  | 1.032  | 1.00 | 0.00 | H |
| HETATM | 132 | C | MOL | A | 1 | 4.585  | -0.371 | 1.865  | 1.00 | 0.00 | C |
| HETATM | 133 | H | MOL | A | 1 | 4.870  | -1.007 | 1.039  | 1.00 | 0.00 | H |
| HETATM | 134 | C | MOL | A | 1 | 5.829  | -3.102 | 3.165  | 1.00 | 0.00 | C |
| HETATM | 135 | O | MOL | A | 1 | 4.893  | -3.145 | 4.058  | 1.00 | 0.00 | O |
| HETATM | 136 | N | MOL | A | 1 | 5.892  | -3.822 | 2.005  | 1.00 | 0.00 | N |
| HETATM | 137 | H | MOL | A | 1 | 6.783  | -3.646 | 1.518  | 1.00 | 0.00 | H |
| HETATM | 138 | C | MOL | A | 1 | 5.554  | -5.273 | 1.819  | 1.00 | 0.00 | C |
| HETATM | 139 | H | MOL | A | 1 | 4.347  | -5.340 | 2.086  | 1.00 | 0.00 | H |
| HETATM | 140 | C | MOL | A | 1 | 5.905  | -5.676 | 0.368  | 1.00 | 0.00 | C |
| HETATM | 141 | H | MOL | A | 1 | 6.958  | -6.004 | 0.372  | 1.00 | 0.00 | H |
| HETATM | 142 | H | MOL | A | 1 | 5.288  | -6.545 | 0.106  | 1.00 | 0.00 | H |
| HETATM | 143 | C | MOL | A | 1 | 5.694  | -4.597 | -0.690 | 1.00 | 0.00 | C |
| HETATM | 144 | H | MOL | A | 1 | 6.435  | -3.783 | -0.623 | 1.00 | 0.00 | H |

|        |     |   |       |   |        |        |        |      |      |   |
|--------|-----|---|-------|---|--------|--------|--------|------|------|---|
| HETATM | 145 | H | MOL A | 1 | 5.854  | -5.069 | -1.677 | 1.00 | 0.00 | H |
| HETATM | 146 | C | MOL A | 1 | 4.277  | -4.024 | -0.670 | 1.00 | 0.00 | C |
| HETATM | 147 | O | MOL A | 1 | 3.318  | -4.678 | -0.186 | 1.00 | 0.00 | O |
| HETATM | 148 | N | MOL A | 1 | 4.137  | -2.811 | -1.230 | 1.00 | 0.00 | N |
| HETATM | 149 | H | MOL A | 1 | 3.174  | -2.431 | -1.434 | 1.00 | 0.00 | H |
| HETATM | 150 | H | MOL A | 1 | 4.941  | -2.336 | -1.629 | 1.00 | 0.00 | H |
| HETATM | 151 | C | MOL A | 1 | 5.296  | -6.239 | 2.791  | 1.00 | 0.00 | C |
| HETATM | 152 | O | MOL A | 1 | 4.948  | -7.386 | 2.491  | 1.00 | 0.00 | O |
| HETATM | 153 | N | MOL A | 1 | 2.387  | -3.488 | 5.325  | 1.00 | 0.00 | N |
| HETATM | 154 | H | MOL A | 1 | 3.294  | -3.450 | 4.874  | 1.00 | 0.00 | H |
| HETATM | 155 | C | MOL A | 1 | 1.244  | -3.112 | 4.499  | 1.00 | 0.00 | C |
| HETATM | 156 | H | MOL A | 1 | 0.872  | -2.144 | 4.839  | 1.00 | 0.00 | H |
| HETATM | 157 | C | MOL A | 1 | 1.747  | -2.940 | 3.058  | 1.00 | 0.00 | C |
| HETATM | 158 | H | MOL A | 1 | 2.248  | -3.841 | 2.711  | 1.00 | 0.00 | H |
| HETATM | 159 | H | MOL A | 1 | 0.918  | -2.722 | 2.390  | 1.00 | 0.00 | H |
| HETATM | 160 | H | MOL A | 1 | 2.453  | -2.111 | 3.018  | 1.00 | 0.00 | H |
| HETATM | 161 | C | MOL A | 1 | 0.077  | -4.105 | 4.624  | 1.00 | 0.00 | C |
| HETATM | 162 | O | MOL A | 1 | -0.921 | -3.798 | 5.273  | 1.00 | 0.00 | O |
| HETATM | 163 | N | MOL A | 1 | -3.704 | -4.006 | 6.536  | 1.00 | 0.00 | N |
| HETATM | 164 | H | MOL A | 1 | -3.314 | -4.931 | 6.668  | 1.00 | 0.00 | H |
| HETATM | 165 | C | MOL A | 1 | -4.655 | -3.858 | 5.418  | 1.00 | 0.00 | C |
| HETATM | 166 | H | MOL A | 1 | -4.162 | -3.281 | 4.639  | 1.00 | 0.00 | H |
| HETATM | 167 | C | MOL A | 1 | -4.905 | -5.285 | 4.884  | 1.00 | 0.00 | C |
| HETATM | 168 | H | MOL A | 1 | -3.998 | -5.604 | 4.372  | 1.00 | 0.00 | H |
| HETATM | 169 | H | MOL A | 1 | -5.043 | -5.954 | 5.736  | 1.00 | 0.00 | H |
| HETATM | 170 | C | MOL A | 1 | -6.082 | -5.549 | 3.934  | 1.00 | 0.00 | C |
| HETATM | 171 | H | MOL A | 1 | -5.953 | -6.556 | 3.535  | 1.00 | 0.00 | H |
| HETATM | 172 | H | MOL A | 1 | -7.006 | -5.548 | 4.511  | 1.00 | 0.00 | H |
| HETATM | 173 | C | MOL A | 1 | -6.261 | -4.597 | 2.748  | 1.00 | 0.00 | C |
| HETATM | 174 | H | MOL A | 1 | -6.852 | -5.116 | 1.994  | 1.00 | 0.00 | H |
| HETATM | 175 | H | MOL A | 1 | -6.848 | -3.738 | 3.059  | 1.00 | 0.00 | H |
| HETATM | 176 | N | MOL A | 1 | -5.001 | -4.161 | 2.130  | 1.00 | 0.00 | N |
| HETATM | 177 | H | MOL A | 1 | -4.424 | -4.881 | 1.701  | 1.00 | 0.00 | H |
| HETATM | 178 | C | MOL A | 1 | -4.710 | -2.924 | 1.793  | 1.00 | 0.00 | C |
| HETATM | 179 | N | MOL A | 1 | -5.236 | -1.887 | 2.373  | 1.00 | 0.00 | N |
| HETATM | 180 | H | MOL A | 1 | -5.719 | -2.031 | 3.262  | 1.00 | 0.00 | H |
| HETATM | 181 | H | MOL A | 1 | -4.815 | -1.004 | 2.157  | 1.00 | 0.00 | H |
| HETATM | 182 | N | MOL A | 1 | -3.857 | -2.689 | 0.855  | 1.00 | 0.00 | N |
| HETATM | 183 | H | MOL A | 1 | -3.287 | -3.448 | 0.487  | 1.00 | 0.00 | H |
| HETATM | 184 | H | MOL A | 1 | -3.833 | -1.779 | 0.391  | 1.00 | 0.00 | H |
| HETATM | 185 | C | MOL A | 1 | -5.932 | -3.085 | 5.750  | 1.00 | 0.00 | C |
| HETATM | 186 | O | MOL A | 1 | -6.532 | -3.286 | 6.828  | 1.00 | 0.00 | O |
| HETATM | 187 | O | MOL A | 1 | -6.379 | -2.299 | 4.887  | 1.00 | 0.00 | O |
| HETATM | 188 | C | MOL A | 1 | -7.384 | -4.383 | -1.377 | 1.00 | 0.00 | C |
| HETATM | 189 | O | MOL A | 1 | -6.737 | -3.928 | -0.351 | 1.00 | 0.00 | O |
| HETATM | 190 | N | MOL A | 1 | -6.853 | -5.001 | -2.507 | 1.00 | 0.00 | N |
| HETATM | 191 | H | MOL A | 1 | -7.423 | -5.819 | -2.818 | 1.00 | 0.00 | H |
| HETATM | 192 | C | MOL A | 1 | -5.442 | -5.480 | -2.517 | 1.00 | 0.00 | C |
| HETATM | 193 | H | MOL A | 1 | -5.182 | -5.741 | -3.619 | 1.00 | 0.00 | H |
| HETATM | 194 | C | MOL A | 1 | -4.466 | -4.367 | -2.146 | 1.00 | 0.00 | C |
| HETATM | 195 | H | MOL A | 1 | -4.691 | -4.115 | -1.104 | 1.00 | 0.00 | H |
| HETATM | 196 | H | MOL A | 1 | -3.444 | -4.761 | -2.182 | 1.00 | 0.00 | H |
| HETATM | 197 | C | MOL A | 1 | -4.641 | -3.148 | -3.085 | 1.00 | 0.00 | C |



|        |     |   |     |   |   |        |        |        |      |      |   |
|--------|-----|---|-----|---|---|--------|--------|--------|------|------|---|
| HETATM | 198 | H | MOL | A | 1 | -5.443 | -3.335 | -3.820 | 1.00 | 0.00 | H |
| HETATM | 199 | H | MOL | A | 1 | -4.996 | -2.282 | -2.495 | 1.00 | 0.00 | H |
| HETATM | 200 | C | MOL | A | 1 | -3.323 | -2.867 | -3.819 | 1.00 | 0.00 | C |
| HETATM | 201 | H | MOL | A | 1 | -2.574 | -2.415 | -3.153 | 1.00 | 0.00 | H |
| HETATM | 202 | H | MOL | A | 1 | -2.891 | -3.822 | -4.175 | 1.00 | 0.00 | H |
| HETATM | 203 | N | MOL | A | 1 | -3.446 | -2.012 | -5.002 | 1.00 | 0.00 | N |
| HETATM | 204 | H | MOL | A | 1 | -3.344 | -2.449 | -5.931 | 1.00 | 0.00 | H |
| HETATM | 205 | C | MOL | A | 1 | -3.553 | -0.685 | -4.979 | 1.00 | 0.00 | C |
| HETATM | 206 | N | MOL | A | 1 | -3.809 | -0.048 | -3.817 | 1.00 | 0.00 | N |
| HETATM | 207 | H | MOL | A | 1 | -4.168 | -0.523 | -2.984 | 1.00 | 0.00 | H |
| HETATM | 208 | H | MOL | A | 1 | -3.654 | 0.954  | -3.675 | 1.00 | 0.00 | H |
| HETATM | 209 | N | MOL | A | 1 | -3.380 | 0.066  | -6.090 | 1.00 | 0.00 | N |
| HETATM | 210 | H | MOL | A | 1 | -3.269 | -0.519 | -6.940 | 1.00 | 0.00 | H |
| HETATM | 211 | H | MOL | A | 1 | -4.074 | 0.846  | -6.168 | 1.00 | 0.00 | H |
| HETATM | 212 | C | MOL | A | 1 | -5.482 | -6.887 | -2.394 | 1.00 | 0.00 | C |
| HETATM | 213 | O | MOL | A | 1 | -5.821 | -7.656 | -3.301 | 1.00 | 0.00 | O |
| HETATM | 214 | C | MOL | A | 1 | -2.759 | -6.575 | -4.137 | 1.00 | 0.00 | C |
| HETATM | 215 | O | MOL | A | 1 | -2.137 | -5.503 | -4.557 | 1.00 | 0.00 | O |
| HETATM | 216 | N | MOL | A | 1 | -2.656 | -7.054 | -2.830 | 1.00 | 0.00 | N |
| HETATM | 217 | H | MOL | A | 1 | -3.165 | -7.936 | -2.676 | 1.00 | 0.00 | H |
| HETATM | 218 | C | MOL | A | 1 | -1.435 | -6.864 | -1.971 | 1.00 | 0.00 | C |
| HETATM | 219 | H | MOL | A | 1 | -1.055 | -5.831 | -2.124 | 1.00 | 0.00 | H |
| HETATM | 220 | C | MOL | A | 1 | -1.809 | -7.027 | -0.446 | 1.00 | 0.00 | C |
| HETATM | 221 | H | MOL | A | 1 | -2.400 | -7.937 | -0.283 | 1.00 | 0.00 | H |
| HETATM | 222 | H | MOL | A | 1 | -0.881 | -7.111 | 0.150  | 1.00 | 0.00 | H |
| HETATM | 223 | C | MOL | A | 1 | -2.536 | -5.799 | 0.226  | 1.00 | 0.00 | C |
| HETATM | 224 | O | MOL | A | 1 | -2.083 | -4.632 | 0.030  | 1.00 | 0.00 | O |
| HETATM | 225 | O | MOL | A | 1 | -3.423 | -6.156 | 1.039  | 1.00 | 0.00 | O |
| HETATM | 226 | C | MOL | A | 1 | -0.549 | -7.914 | -2.424 | 1.00 | 0.00 | C |
| HETATM | 227 | O | MOL | A | 1 | -0.156 | -7.962 | -3.594 | 1.00 | 0.00 | O |
| HETATM | 228 | N | MOL | A | 1 | 2.231  | -7.512 | -5.296 | 1.00 | 0.00 | N |
| HETATM | 229 | H | MOL | A | 1 | 1.287  | -7.519 | -4.921 | 1.00 | 0.00 | H |
| HETATM | 230 | C | MOL | A | 1 | 3.304  | -7.016 | -4.431 | 1.00 | 0.00 | C |
| HETATM | 231 | H | MOL | A | 1 | 4.045  | -6.528 | -5.064 | 1.00 | 0.00 | H |
| HETATM | 232 | C | MOL | A | 1 | 2.773  | -5.925 | -3.489 | 1.00 | 0.00 | C |
| HETATM | 233 | H | MOL | A | 1 | 1.995  | -6.339 | -2.849 | 1.00 | 0.00 | H |
| HETATM | 234 | H | MOL | A | 1 | 3.588  | -5.601 | -2.844 | 1.00 | 0.00 | H |
| HETATM | 235 | C | MOL | A | 1 | 2.234  | -4.701 | -4.212 | 1.00 | 0.00 | C |
| HETATM | 236 | C | MOL | A | 1 | 0.900  | -4.670 | -4.653 | 1.00 | 0.00 | C |
| HETATM | 237 | H | MOL | A | 1 | 0.262  | -5.520 | -4.479 | 1.00 | 0.00 | H |
| HETATM | 238 | C | MOL | A | 1 | 0.388  | -3.538 | -5.311 | 1.00 | 0.00 | C |
| HETATM | 239 | H | MOL | A | 1 | -0.646 | -3.520 | -5.634 | 1.00 | 0.00 | H |
| HETATM | 240 | C | MOL | A | 1 | 1.212  | -2.421 | -5.524 | 1.00 | 0.00 | C |
| HETATM | 241 | H | MOL | A | 1 | 0.816  | -1.533 | -5.999 | 1.00 | 0.00 | H |
| HETATM | 242 | C | MOL | A | 1 | 2.554  | -2.452 | -5.107 | 1.00 | 0.00 | C |
| HETATM | 243 | H | MOL | A | 1 | 3.181  | -1.581 | -5.259 | 1.00 | 0.00 | H |
| HETATM | 244 | C | MOL | A | 1 | 3.061  | -3.588 | -4.450 | 1.00 | 0.00 | C |
| HETATM | 245 | H | MOL | A | 1 | 4.081  | -3.587 | -4.102 | 1.00 | 0.00 | H |
| HETATM | 246 | C | MOL | A | 1 | 4.074  | -8.155 | -3.731 | 1.00 | 0.00 | C |
| HETATM | 247 | O | MOL | A | 1 | 4.543  | -7.990 | -2.610 | 1.00 | 0.00 | O |
| HETATM | 248 | N | MOL | A | 1 | -3.489 | 12.039 | -2.647 | 1.00 | 0.00 | N |
| HETATM | 249 | H | MOL | A | 1 | -3.689 | 12.392 | -3.579 | 1.00 | 0.00 | H |
| HETATM | 250 | C | MOL | A | 1 | -3.020 | 10.657 | -2.528 | 1.00 | 0.00 | C |

|        |     |   |     |   |   |        |        |        |      |      |   |
|--------|-----|---|-----|---|---|--------|--------|--------|------|------|---|
| HETATM | 251 | H | MOL | A | 1 | -2.451 | 10.572 | -1.606 | 1.00 | 0.00 | H |
| HETATM | 252 | C | MOL | A | 1 | -4.249 | 9.731  | -2.410 | 1.00 | 0.00 | C |
| HETATM | 253 | H | MOL | A | 1 | -4.753 | 9.962  | -1.470 | 1.00 | 0.00 | H |
| HETATM | 254 | H | MOL | A | 1 | -4.941 | 9.957  | -3.219 | 1.00 | 0.00 | H |
| HETATM | 255 | C | MOL | A | 1 | -3.930 | 8.226  | -2.445 | 1.00 | 0.00 | C |
| HETATM | 256 | H | MOL | A | 1 | -3.470 | 7.984  | -3.397 | 1.00 | 0.00 | H |
| HETATM | 257 | H | MOL | A | 1 | -3.226 | 7.974  | -1.657 | 1.00 | 0.00 | H |
| HETATM | 258 | C | MOL | A | 1 | -5.190 | 7.359  | -2.296 | 1.00 | 0.00 | C |
| HETATM | 259 | H | MOL | A | 1 | -5.935 | 7.689  | -3.019 | 1.00 | 0.00 | H |
| HETATM | 260 | H | MOL | A | 1 | -4.929 | 6.323  | -2.513 | 1.00 | 0.00 | H |
| HETATM | 261 | N | MOL | A | 1 | -5.747 | 7.432  | -0.939 | 1.00 | 0.00 | N |
| HETATM | 262 | H | MOL | A | 1 | -5.118 | 7.776  | -0.211 | 1.00 | 0.00 | H |
| HETATM | 263 | C | MOL | A | 1 | -6.966 | 7.104  | -0.562 | 1.00 | 0.00 | C |
| HETATM | 264 | N | MOL | A | 1 | -7.874 | 6.652  | -1.377 | 1.00 | 0.00 | N |
| HETATM | 265 | H | MOL | A | 1 | -7.736 | 6.654  | -2.388 | 1.00 | 0.00 | H |
| HETATM | 266 | H | MOL | A | 1 | -8.804 | 6.516  | -1.014 | 1.00 | 0.00 | H |
| HETATM | 267 | N | MOL | A | 1 | -7.336 | 7.220  | 0.676  | 1.00 | 0.00 | N |
| HETATM | 268 | H | MOL | A | 1 | -6.697 | 7.585  | 1.380  | 1.00 | 0.00 | H |
| HETATM | 269 | H | MOL | A | 1 | -8.300 | 7.003  | 0.906  | 1.00 | 0.00 | H |
| HETATM | 270 | C | MOL | A | 1 | -2.056 | 10.294 | -3.659 | 1.00 | 0.00 | C |
| HETATM | 271 | O | MOL | A | 1 | -2.515 | 10.282 | -4.824 | 1.00 | 0.00 | O |
| HETATM | 272 | O | MOL | A | 1 | -0.865 | 10.064 | -3.362 | 1.00 | 0.00 | O |
| HETATM | 273 | O | MOL | A | 1 | 2.486  | -0.193 | -2.852 | 1.00 | 0.00 | O |
| HETATM | 274 | C | MOL | A | 1 | 1.476  | -0.763 | -2.381 | 1.00 | 0.00 | C |
| HETATM | 275 | N | MOL | A | 1 | 1.542  | -1.949 | -1.724 | 1.00 | 0.00 | N |
| HETATM | 276 | C | MOL | A | 1 | 0.434  | -2.592 | -1.300 | 1.00 | 0.00 | C |
| HETATM | 277 | N | MOL | A | 1 | 0.560  | -3.754 | -0.646 | 1.00 | 0.00 | N |
| HETATM | 278 | H | MOL | A | 1 | -0.306 | -4.276 | -0.425 | 1.00 | 0.00 | H |
| HETATM | 279 | H | MOL | A | 1 | 1.509  | -4.158 | -0.556 | 1.00 | 0.00 | H |
| HETATM | 280 | C | MOL | A | 1 | -0.870 | -2.000 | -1.462 | 1.00 | 0.00 | C |
| HETATM | 281 | H | MOL | A | 1 | -1.767 | -2.516 | -1.126 | 1.00 | 0.00 | H |
| HETATM | 282 | C | MOL | A | 1 | -0.926 | -0.756 | -2.018 | 1.00 | 0.00 | C |
| HETATM | 283 | H | MOL | A | 1 | -1.855 | -0.201 | -2.160 | 1.00 | 0.00 | H |
| HETATM | 284 | N | MOL | A | 1 | 0.206  | -0.118 | -2.459 | 1.00 | 0.00 | N |
| HETATM | 285 | C | MOL | A | 1 | 0.185  | 1.282  | -2.952 | 1.00 | 0.00 | C |
| HETATM | 286 | O | MOL | A | 1 | -1.170 | 1.739  | -3.003 | 1.00 | 0.00 | O |
| HETATM | 287 | H | MOL | A | 1 | 0.623  | 1.315  | -3.968 | 1.00 | 0.00 | H |
| HETATM | 288 | C | MOL | A | 1 | 0.962  | 2.196  | -1.990 | 1.00 | 0.00 | C |
| HETATM | 289 | H | MOL | A | 1 | 1.864  | 1.705  | -1.612 | 1.00 | 0.00 | H |
| HETATM | 290 | H | MOL | A | 1 | 1.238  | 3.140  | -2.495 | 1.00 | 0.00 | H |
| HETATM | 291 | S | MOL | A | 1 | -0.236 | 2.527  | -0.652 | 1.00 | 0.00 | S |
| HETATM | 292 | C | MOL | A | 1 | -1.415 | 2.771  | -2.039 | 1.00 | 0.00 | C |
| HETATM | 293 | H | MOL | A | 1 | -1.181 | 3.748  | -2.501 | 1.00 | 0.00 | H |
| HETATM | 294 | C | MOL | A | 1 | -2.850 | 2.748  | -1.550 | 1.00 | 0.00 | C |
| HETATM | 295 | H | MOL | A | 1 | -3.060 | 3.687  | -1.015 | 1.00 | 0.00 | H |
| HETATM | 296 | H | MOL | A | 1 | -3.011 | 1.898  | -0.870 | 1.00 | 0.00 | H |
| HETATM | 297 | O | MOL | A | 1 | -3.839 | 2.556  | -2.584 | 1.00 | 0.00 | O |
| HETATM | 298 | H | MOL | A | 1 | -3.717 | 3.156  | -3.377 | 1.00 | 0.00 | H |
| HETATM | 299 | O | MOL | A | 1 | 2.399  | 1.285  | -5.262 | 1.00 | 0.00 | O |
| HETATM | 300 | H | MOL | A | 1 | 2.535  | 2.263  | -5.145 | 1.00 | 0.00 | H |
| HETATM | 301 | H | MOL | A | 1 | 2.596  | 0.918  | -4.369 | 1.00 | 0.00 | H |
| HETATM | 302 | O | MOL | A | 1 | -6.485 | 2.974  | -1.912 | 1.00 | 0.00 | O |
| HETATM | 303 | H | MOL | A | 1 | -5.531 | 3.164  | -2.124 | 1.00 | 0.00 | H |

|        |     |   |       |   |        |        |        |      |      |   |
|--------|-----|---|-------|---|--------|--------|--------|------|------|---|
| HETATM | 304 | H | MOL A | 1 | -6.381 | 1.985  | -2.095 | 1.00 | 0.00 | H |
| HETATM | 305 | O | MOL A | 1 | -6.722 | 4.077  | -4.765 | 1.00 | 0.00 | O |
| HETATM | 306 | H | MOL A | 1 | -5.706 | 4.111  | -4.797 | 1.00 | 0.00 | H |
| HETATM | 307 | H | MOL A | 1 | -6.792 | 3.758  | -3.825 | 1.00 | 0.00 | H |
| HETATM | 308 | O | MOL A | 1 | 2.461  | -6.449 | 2.399  | 1.00 | 0.00 | O |
| HETATM | 309 | H | MOL A | 1 | 2.662  | -6.318 | 1.442  | 1.00 | 0.00 | H |
| HETATM | 310 | H | MOL A | 1 | 3.365  | -6.853 | 2.652  | 1.00 | 0.00 | H |
| HETATM | 311 | O | MOL A | 1 | -6.984 | 0.529  | -4.226 | 1.00 | 0.00 | O |
| HETATM | 312 | H | MOL A | 1 | -7.606 | 1.225  | -3.880 | 1.00 | 0.00 | H |
| HETATM | 313 | H | MOL A | 1 | -6.472 | 0.356  | -3.356 | 1.00 | 0.00 | H |
| HETATM | 314 | O | MOL A | 1 | -5.400 | 1.918  | -5.888 | 1.00 | 0.00 | O |
| HETATM | 315 | H | MOL A | 1 | -4.850 | 2.640  | -5.438 | 1.00 | 0.00 | H |
| HETATM | 316 | H | MOL A | 1 | -5.767 | 1.445  | -5.085 | 1.00 | 0.00 | H |
| HETATM | 317 | H | MOL A | 1 | 0.342  | 5.675  | 5.988  | 1.00 | 0.00 | H |
| HETATM | 318 | H | MOL A | 1 | 4.919  | 6.880  | 3.002  | 1.00 | 0.00 | H |
| HETATM | 319 | H | MOL A | 1 | -5.979 | 2.563  | 4.460  | 1.00 | 0.00 | H |
| HETATM | 320 | H | MOL A | 1 | -1.612 | 3.364  | 7.947  | 1.00 | 0.00 | H |
| HETATM | 321 | H | MOL A | 1 | -8.458 | -4.269 | -1.355 | 1.00 | 0.00 | H |
| HETATM | 322 | H | MOL A | 1 | -8.174 | 1.599  | 3.140  | 1.00 | 0.00 | H |
| HETATM | 323 | H | MOL A | 1 | -5.197 | -7.318 | -1.446 | 1.00 | 0.00 | H |
| HETATM | 324 | H | MOL A | 1 | -0.225 | -8.670 | -1.725 | 1.00 | 0.00 | H |
| HETATM | 325 | H | MOL A | 1 | 2.421  | -7.832 | -6.224 | 1.00 | 0.00 | H |
| HETATM | 326 | H | MOL A | 1 | 4.202  | -9.103 | -4.232 | 1.00 | 0.00 | H |
| HETATM | 327 | H | MOL A | 1 | 5.404  | -5.978 | 3.833  | 1.00 | 0.00 | H |
| HETATM | 328 | H | MOL A | 1 | -3.608 | 12.617 | -1.840 | 1.00 | 0.00 | H |
| HETATM | 329 | H | MOL A | 1 | -4.622 | 5.294  | 4.796  | 1.00 | 0.00 | H |
| HETATM | 330 | H | MOL A | 1 | 0.134  | -5.071 | 4.144  | 1.00 | 0.00 | H |
| HETATM | 331 | H | MOL A | 1 | 2.281  | -3.767 | 6.279  | 1.00 | 0.00 | H |
| HETATM | 332 | H | MOL A | 1 | -3.459 | -3.238 | 7.128  | 1.00 | 0.00 | H |
| HETATM | 333 | H | MOL A | 1 | 5.272  | 4.794  | 5.288  | 1.00 | 0.00 | H |
| HETATM | 334 | H | MOL A | 1 | 8.893  | 4.592  | 2.116  | 1.00 | 0.00 | H |
| HETATM | 335 | H | MOL A | 1 | -3.382 | -7.115 | -4.834 | 1.00 | 0.00 | H |
| HETATM | 336 | H | MOL A | 1 | 8.139  | -3.291 | 4.908  | 1.00 | 0.00 | H |

END

**Table S1.** Descriptors of intra- and intermolecular interactions in polymorph II of *Lamivudine*.

|                             | rho      | d2rho    | g        | v         | h        | E           |
|-----------------------------|----------|----------|----------|-----------|----------|-------------|
| 3 (3,-1) S(1) 1 - S(1) 28   | 0,015633 | 0,027051 | 0,007315 | -0,007867 | -0,00055 | -10,3422131 |
| 6 (3,-1) H(8B) 26 - H(1) 51 | 0,004832 | 0,021991 | 0,004062 | -0,002626 | 0,001436 | -3,45222469 |
| 15 (3,-1) O(1) 2 - H(3A)    | 0,008381 | 0,041513 | 0,007912 | -0,005445 | 0,002466 | -7,15817343 |
| 16 (3,-1) O(1) 2 - O(3)     | 0,003013 | 0,010444 | 0,001921 | -0,001231 | 0,00069  | -1,61831249 |
| 22 (3,-1) O(2) 3 - H(7)     | 0,013837 | 0,07623  | 0,014995 | -0,010932 | 0,004063 | -14,3715614 |
| 25 (3,-1) O(2) 3 - H(3A)    | 0,013278 | 0,080081 | 0,015485 | -0,010949 | 0,004536 | -14,3939102 |
| 27 (3,-1) O(2) 3 - O(2)     | 0,005062 | 0,02368  | 0,004375 | -0,00283  | 0,001545 | -3,7204097  |
| 26 (3,-1) H(2) 17 - N(2)    | 0,03946  | 0,151543 | 0,038389 | -0,038893 | -0,0005  | -51,129998  |
| 39 (3,-1) O(3) 4 - H(3)     | 0,016549 | 0,084023 | 0,017089 | -0,013173 | 0,003916 | -17,3176526 |
| 40 (3,-1) O(3) 4 - H(3B)    | 0,016507 | 0,090021 | 0,018076 | -0,013647 | 0,004429 | -17,9407884 |
| 41 (3,-1) O(3) 4 - H(6)     | 0,006812 | 0,030698 | 0,005819 | -0,003964 | 0,001855 | -5,21120284 |
| 42 (3,-1) O(3) 4 - H(2B)    | 0,005534 | 0,022637 | 0,00427  | -0,002881 | 0,001389 | -3,78745595 |
| 43 (3,-1) O(3) 4 - H(8A)    | 0,004232 | 0,020154 | 0,003677 | -0,002315 | 0,001362 | -3,04337401 |
| 44 (3,-1) O(3) 4 - H(8B)    | 0,009332 | 0,039552 | 0,00778  | -0,005671 | 0,002108 | -7,45528035 |
| 49 (3,-1) O(3) 4 - O(1)     | 0,003013 | 0,010444 | 0,001921 | -0,001231 | 0,00069  | -1,61831249 |
| 61 (3,-1) C(7) 14 - H(3)    | 0,002787 | 0,010672 | 0,001937 | -0,001206 | 0,000731 | -1,58544668 |
| 65 (3,-1) N(2) 6 - H(2)     | 0,03946  | 0,151543 | 0,038389 | -0,038893 | -0,0005  | -51,129998  |
| 73 (3,-1) H(3B) 22 - O(3)   | 0,016507 | 0,090022 | 0,018076 | -0,013647 | 0,004429 | -17,9407884 |
| 74 (3,-1) H(3A) 21 - O(2)   | 0,013278 | 0,080082 | 0,015485 | -0,010949 | 0,004536 | -14,3939102 |
| 75 (3,-1) H(3A) 21 - H(7)   | 0,004002 | 0,018406 | 0,003357 | -0,002113 | 0,001244 | -2,77781827 |
| 94 (3,-1) H(2B) 19 - H(3)   | 0,00549  | 0,026089 | 0,004839 | -0,003155 | 0,001683 | -4,14766523 |
| 95 (3,-1) H(2A) 18 - H(2A)  | 0,004251 | 0,014868 | 0,002798 | -0,001879 | 0,000919 | -2,47019428 |
| 102 (3,-1) H(3) 20 - H(2B)  | 0,00549  | 0,026089 | 0,004839 | -0,003155 | 0,001683 | -4,14766523 |
| 105 (3,-1) C(4) 11 - H(2B)  | 0,00551  | 0,019069 | 0,003672 | -0,002576 | 0,001095 | -3,38649307 |
| 112 (3,-1) H(6) 23 - O(3)   | 0,006812 | 0,030698 | 0,005819 | -0,003964 | 0,001855 | -5,21120284 |
| 119 (3,-1) H(7) 24 - H(3A)  | 0,004002 | 0,018407 | 0,003358 | -0,002113 | 0,001244 | -2,77781827 |
| 126 (3,-1) H(8B) 26 - O(3)  | 0,009332 | 0,039552 | 0,00778  | -0,005671 | 0,002108 | -7,45528035 |
| 133 (3,-1) H(2B) 19 - O(3)  | 0,005534 | 0,022637 | 0,00427  | -0,002881 | 0,001389 | -3,78745595 |
| 135 (3,-1) H(2B) 19 - C(4)  | 0,00551  | 0,019069 | 0,003672 | -0,002576 | 0,001095 | -3,38649307 |
| 137 (3,-1) H(3) 20 - C(7)   | 0,002787 | 0,010672 | 0,001937 | -0,001206 | 0,000731 | -1,58544668 |
| 147 (3,-1) H(6) 23 - H(8A)  | 0,000993 | 0,005471 | 0,00094  | -0,000513 | 0,000428 | -0,67440642 |
| 150 (3,-1) H(8A) 25 - H(6)  | 0,000993 | 0,005471 | 0,00094  | -0,000513 | 0,000428 | -0,67440642 |
| 153 (3,-1) H(2B) 26 - N(3)  | 0,003628 | 0,019563 | 0,003506 | -0,002122 | 0,001384 | -2,78964996 |
| (3,-1) N(3)-H(2B)           | 0,003628 | 0,019563 | 0,003506 | -0,002122 | 0,001384 | -2,78964996 |
| (3,-1) S(1) 1 - C(5)        | 0,005927 | 0,014773 | 0,003019 | -0,002346 | 0,000674 | -3,08412762 |
| (3,-1) C(5) - S(1)          | 0,005927 | 0,014773 | 0,003019 | -0,002346 | 0,000674 | -3,08412762 |

**Table S2.** Descriptors of intra- and intermolecular interactions in complexes A and B.

## Complex A

| Connected atoms | Residues      | Density of all electrons | Hamiltonian kinetic energy K(r) | Potential energy density | Energy density E(r) or H(r) | Laplacian of electron density | Ellipticity of electron density |
|-----------------|---------------|--------------------------|---------------------------------|--------------------------|-----------------------------|-------------------------------|---------------------------------|
| 304O--247H      | ASP100--3TC92 | 0,046                    | 0,002                           | -0,034                   | -0,002                      | 0,123                         | 0,055                           |
| 199H--250H      | ARG54--3TC92  | 0,003                    | -0,001                          | -0,001                   | 0,001                       | 0,014                         | 1,533                           |
| 247H--246N      | 3TC92--3TC92  | 0,305                    | 0,445                           | -0,494                   | -0,445                      | -1,582                        | 0,035                           |
| 67H--249C       | TRP25--3TC92  | 0,006                    | -0,001                          | -0,003                   | 0,001                       | 0,020                         | 0,776                           |
| 281H--250H      | ARG95--3TC92  | 0,001                    | 0,000                           | 0,000                    | 0,000                       | 0,003                         | 0,218                           |
| 246N--248H      | 3TC92--3TC92  | 0,321                    | 0,471                           | -0,520                   | -0,471                      | -1,691                        | 0,035                           |
| 248H--163O      | 3TC92--GLN47  | 0,027                    | 0,001                           | -0,020                   | -0,001                      | 0,068                         | 0,030                           |
| 250H--249C      | 3TC92--3TC92  | 0,276                    | 0,281                           | -0,325                   | -0,281                      | -0,943                        | 0,037                           |
| 246N--313H      | 3TC92--PHE104 | 0,006                    | -0,001                          | -0,003                   | 0,001                       | 0,018                         | 0,162                           |
| 246N--245C      | 3TC92--3TC92  | 0,342                    | 0,553                           | -0,848                   | -0,553                      | -1,031                        | 0,171                           |
| 249C--245C      | 3TC92--3TC92  | 0,284                    | 0,259                           | -0,342                   | -0,259                      | -0,708                        | 0,169                           |
| 69H--251C       | TRP25--3TC92  | 0,008                    | -0,001                          | -0,004                   | 0,001                       | 0,026                         | 1,265                           |
| 31O--265H       | GLU20--3TC92  | 0,007                    | -0,001                          | -0,004                   | 0,001                       | 0,024                         | 0,116                           |
| 249C--251C      | 3TC92--3TC92  | 0,323                    | 0,342                           | -0,464                   | -0,342                      | -0,877                        | 0,322                           |
| 245C--244N      | 3TC92--3TC92  | 0,332                    | 0,481                           | -0,685                   | -0,481                      | -1,108                        | 0,116                           |
| 251C--252H      | 3TC92--3TC92  | 0,283                    | 0,294                           | -0,329                   | -0,294                      | -1,034                        | 0,023                           |
| 69H--260S       | TRP25--3TC92  | 0,006                    | -0,001                          | -0,002                   | 0,001                       | 0,016                         | 0,139                           |
| 251C--318C      | 3TC92--PHE104 | 0,008                    | -0,001                          | -0,004                   | 0,001                       | 0,025                         | 1,617                           |
| 244N--165H      | 3TC92--GLN47  | 0,047                    | 0,004                           | -0,032                   | -0,004                      | 0,097                         | 0,049                           |
| 252H--265H      | 3TC92--3TC92  | 0,007                    | -0,001                          | -0,004                   | 0,001                       | 0,025                         | 0,363                           |
| 251C--253N      | 3TC92--3TC92  | 0,308                    | 0,477                           | -0,750                   | -0,477                      | -0,813                        | 0,073                           |
| 244N--315C      | 3TC92--PHE104 | 0,005                    | -0,001                          | -0,003                   | 0,001                       | 0,016                         | 1,040                           |
| 265H--263C      | 3TC92--3TC92  | 0,274                    | 0,273                           | -0,313                   | -0,273                      | -0,930                        | 0,042                           |
| 334O--264H      | WAT158--3TC92 | 0,020                    | 0,001                           | -0,014                   | -0,001                      | 0,050                         | 0,157                           |

|            |               |       |        |        |        |        |       |
|------------|---------------|-------|--------|--------|--------|--------|-------|
| 244N--243C | 3TC92--3TC92  | 0,335 | 0,478  | -0,675 | -0,478 | -1,120 | 0,177 |
| 40H--260S  | VAL22--3TC92  | 0,006 | -0,001 | -0,003 | 0,001  | 0,022  | 0,345 |
| 252H--255O | 3TC92--3TC92  | 0,017 | -0,002 | -0,013 | 0,002  | 0,069  | 1,559 |
| 288H--266O | ARG95--3TC92  | 0,046 | 0,003  | -0,033 | -0,003 | 0,114  | 0,030 |
| 253N--243C | 3TC92--3TC92  | 0,282 | 0,356  | -0,508 | -0,356 | -0,810 | 0,145 |
| 264H--263C | 3TC92--3TC92  | 0,280 | 0,287  | -0,324 | -0,287 | -1,001 | 0,030 |
| 263C--266O | 3TC92--3TC92  | 0,239 | 0,290  | -0,452 | -0,290 | -0,512 | 0,013 |
| 253N--320C | 3TC92--PHE104 | 0,007 | -0,001 | -0,004 | 0,001  | 0,021  | 1,801 |
| 243C--324C | 3TC92--PHE104 | 0,005 | -0,001 | -0,002 | 0,001  | 0,018  | 1,444 |
| 243C--242O | 3TC92--3TC92  | 0,379 | 0,644  | -1,227 | -0,644 | -0,246 | 0,132 |
| 145H--242O | PHE46--3TC92  | 0,005 | -0,001 | -0,003 | 0,001  | 0,020  | 0,778 |
| 263C--261C | 3TC92--3TC92  | 0,258 | 0,213  | -0,273 | -0,213 | -0,614 | 0,029 |
| 267H--266O | 3TC92--3TC92  | 0,304 | 0,464  | -0,537 | -0,464 | -1,564 | 0,024 |
| 253N--254C | 3TC92--3TC92  | 0,253 | 0,271  | -0,379 | -0,271 | -0,652 | 0,144 |
| 267H--239O | 3TC92--GLU73  | 0,055 | 0,004  | -0,044 | -0,004 | 0,146  | 0,012 |
| 260S--261C | 3TC92--3TC92  | 0,169 | 0,107  | -0,156 | -0,107 | -0,232 | 0,097 |
| 260S--47H  | 3TC92--VAL22  | 0,007 | -0,001 | -0,003 | 0,001  | 0,024  | 1,186 |
| 255O--321H | 3TC92--PHE104 | 0,008 | -0,001 | -0,005 | 0,001  | 0,029  | 0,837 |
| 261C--255O | 3TC92--3TC92  | 0,252 | 0,332  | -0,529 | -0,332 | -0,542 | 0,070 |
| 260S--257C | 3TC92--3TC92  | 0,172 | 0,112  | -0,163 | -0,112 | -0,247 | 0,070 |
| 255O--254C | 3TC92--3TC92  | 0,260 | 0,354  | -0,562 | -0,354 | -0,581 | 0,076 |
| 242O--147H | 3TC92--PHE46  | 0,008 | -0,001 | -0,005 | 0,001  | 0,030  | 0,125 |
| 258H--257C | 3TC92--3TC92  | 0,278 | 0,283  | -0,323 | -0,283 | -0,972 | 0,010 |
| 254C--257C | 3TC92--3TC92  | 0,247 | 0,197  | -0,256 | -0,197 | -0,550 | 0,017 |
| 266O--12H  | 3TC92--ILE6   | 0,005 | -0,001 | -0,003 | 0,001  | 0,019  | 0,295 |
| 322C--256H | PHE104--3TC92 | 0,007 | -0,001 | -0,003 | 0,001  | 0,023  | 1,304 |
| 261C--262H | 3TC92--3TC92  | 0,279 | 0,283  | -0,318 | -0,283 | -0,987 | 0,034 |
| 254C--256H | 3TC92--3TC92  | 0,286 | 0,299  | -0,331 | -0,299 | -1,067 | 0,024 |
| 242O--85H  | 3TC92--LEU32  | 0,003 | -0,001 | -0,002 | 0,001  | 0,014  | 0,572 |
| 266O--8H   | 3TC92--ILE6   | 0,007 | -0,001 | -0,005 | 0,001  | 0,026  | 0,270 |

|            |               |       |        |        |        |        |       |
|------------|---------------|-------|--------|--------|--------|--------|-------|
| 258H--85H  | 3TC92--LEU32  | 0,007 | -0,001 | -0,003 | 0,001  | 0,023  | 0,140 |
| 257C--91H  | 3TC92--LEU32  | 0,005 | -0,001 | -0,002 | 0,001  | 0,018  | 0,563 |
| 260S--333H | 3TC92--WAT143 | 0,019 | 0,000  | -0,012 | 0,000  | 0,047  | 0,047 |
| 266O--15H  | 3TC92--ILE6   | 0,003 | -0,001 | -0,001 | 0,001  | 0,012  | 2,962 |
| 257C--259H | 3TC92--3TC92  | 0,276 | 0,280  | -0,318 | -0,280 | -0,968 | 0,014 |
| 242O--330H | 3TC92--WAT137 | 0,027 | 0,000  | -0,020 | 0,000  | 0,077  | 0,038 |
| 255O--14C  | 3TC92--ILE6   | 0,002 | -0,001 | -0,001 | 0,001  | 0,010  | 6,311 |
| 262H--235H | 3TC92--GLU73  | 0,002 | 0,000  | -0,001 | 0,000  | 0,005  | 0,247 |
| 262H--331O | 3TC92--WAT143 | 0,009 | -0,001 | -0,006 | 0,001  | 0,032  | 0,430 |
| 256H--328O | 3TC92--WAT137 | 0,009 | -0,001 | -0,006 | 0,001  | 0,029  | 0,355 |
| 262H--15H  | 3TC92--ILE6   | 0,003 | -0,001 | -0,001 | 0,001  | 0,008  | 0,196 |
| 259H--331O | 3TC92--WAT143 | 0,010 | -0,001 | -0,007 | 0,001  | 0,038  | 0,115 |

## Complex B

| Connected atoms | Residues     | Density of all electrons | Hamiltonian kinetic energy K(r) | Potential energy density | Energy density E(r) or H(r) | Laplacian of electron density | Ellipticity of electron density |
|-----------------|--------------|--------------------------|---------------------------------|--------------------------|-----------------------------|-------------------------------|---------------------------------|
| 146O--293H      | GLN28--3TC60 | 0,031                    | 0,001                           | -0,022                   | -0,001                      | 0,080                         | 0,028                           |
| 293H--291N      | 3TC60--3TC60 | 0,320                    | 0,471                           | -0,520                   | -0,471                      | -1,690                        | 0,035                           |
| 223O--292H      | ASP42--3TC60 | 0,047                    | 0,001                           | -0,035                   | -0,001                      | 0,129                         | 0,041                           |
| 292H--291N      | 3TC60--3TC60 | 0,301                    | 0,437                           | -0,486                   | -0,437                      | -1,554                        | 0,036                           |
| 158H--291N      | ALA31--3TC60 | 0,002                    | 0,000                           | -0,001                   | 0,000                       | 0,008                         | 0,130                           |
| 148H--289N      | GLN28--3TC60 | 0,047                    | 0,004                           | -0,031                   | -0,004                      | 0,096                         | 0,055                           |
| 232H--289N      | PHE46--3TC60 | 0,008                    | -0,001                          | -0,004                   | 0,001                       | 0,026                         | 0,233                           |
| 291N--290C      | 3TC60--3TC60 | 0,341                    | 0,546                           | -0,828                   | -0,546                      | -1,055                        | 0,171                           |
| 290C--289N      | 3TC60--3TC60 | 0,334                    | 0,488                           | -0,697                   | -0,488                      | -1,114                        | 0,120                           |
| 233H--287O      | PHE46--3TC60 | 0,005                    | -0,001                          | -0,003                   | 0,001                       | 0,018                         | 0,516                           |
| 290C--294C      | 3TC60--3TC60 | 0,287                    | 0,264                           | -0,347                   | -0,264                      | -0,722                        | 0,162                           |
| 234C--288C      | PHE46--3TC60 | 0,006                    | -0,001                          | -0,003                   | 0,001                       | 0,021                         | 469,764                         |
| 289N--288C      | 3TC60--3TC60 | 0,328                    | 0,448                           | -0,629                   | -0,448                      | -1,069                        | 0,167                           |
| 50H--294C       | TRP15--3TC60 | 0,003                    | -0,001                          | -0,001                   | 0,001                       | 0,009                         | 0,133                           |
| 295H--294C      | 3TC60--3TC60 | 0,278                    | 0,284                           | -0,327                   | -0,284                      | -0,962                        | 0,035                           |

|            |              |       |        |        |        |        |       |
|------------|--------------|-------|--------|--------|--------|--------|-------|
| 130H--287O | PHE27--3TC60 | 0,012 | -0,001 | -0,008 | 0,001  | 0,038  | 0,041 |
| 294C--237C | 3TC60--PHE46 | 0,006 | -0,001 | -0,003 | 0,001  | 0,016  | 3,251 |
| 288C--287O | 3TC60--3TC60 | 0,387 | 0,661  | -1,278 | -0,661 | -0,174 | 0,148 |
| 288C--128H | 3TC60--PHE27 | 0,005 | -0,001 | -0,002 | 0,001  | 0,020  | 0,893 |
| 294C--296C | 3TC60--3TC60 | 0,324 | 0,344  | -0,467 | -0,344 | -0,881 | 0,320 |
| 288C--298N | 3TC60--3TC60 | 0,279 | 0,349  | -0,502 | -0,349 | -0,787 | 0,135 |
| 295H--205N | 3TC60--ARG37 | 0,007 | -0,001 | -0,004 | 0,001  | 0,023  | 0,563 |
| 287O--315H | 3TC60--WAT61 | 0,013 | -0,001 | -0,010 | 0,001  | 0,045  | 0,097 |
| 296C--298N | 3TC60--3TC60 | 0,311 | 0,485  | -0,769 | -0,485 | -0,801 | 0,078 |
| 128H--303H | PHE27--3TC60 | 0,008 | -0,002 | -0,004 | 0,002  | 0,031  | 0,367 |
| 296C--52H  | 3TC60--TRP15 | 0,003 | -0,001 | -0,001 | 0,001  | 0,008  | 1,171 |
| 296C--297H | 3TC60--3TC60 | 0,286 | 0,301  | -0,339 | -0,301 | -1,048 | 0,026 |
| 298N--299C | 3TC60--3TC60 | 0,253 | 0,265  | -0,369 | -0,265 | -0,646 | 0,155 |
| 297H--205N | 3TC60--ARG37 | 0,012 | -0,001 | -0,007 | 0,001  | 0,037  | 0,223 |
| 241C--301H | PHE46--3TC60 | 0,004 | -0,001 | -0,002 | 0,001  | 0,012  | 0,104 |
| 303H--302C | 3TC60--3TC60 | 0,279 | 0,287  | -0,324 | -0,287 | -1,002 | 0,012 |
| 52H--305S  | TRP15--3TC60 | 0,009 | -0,001 | -0,004 | 0,001  | 0,026  | 0,017 |
| 313O--301H | WAT61--3TC60 | 0,017 | 0,000  | -0,012 | 0,000  | 0,046  | 0,053 |
| 301H--299C | 3TC60--3TC60 | 0,286 | 0,304  | -0,334 | -0,304 | -1,094 | 0,026 |
| 297H--300O | 3TC60--3TC60 | 0,017 | -0,002 | -0,013 | 0,002  | 0,067  | 1,367 |
| 299C--302C | 3TC60--3TC60 | 0,249 | 0,199  | -0,260 | -0,199 | -0,557 | 0,017 |
| 69H--305S  | LEU18--3TC60 | 0,004 | -0,001 | -0,002 | 0,001  | 0,014  | 0,241 |
| 297H--310H | 3TC60--3TC60 | 0,011 | -0,002 | -0,007 | 0,002  | 0,045  | 0,728 |
| 299C--300O | 3TC60--3TC60 | 0,249 | 0,337  | -0,553 | -0,337 | -0,487 | 0,101 |
| 273O--304H | GLU55--3TC60 | 0,007 | -0,001 | -0,004 | 0,001  | 0,027  | 1,768 |
| 302C--305S | 3TC60--3TC60 | 0,172 | 0,111  | -0,161 | -0,111 | -0,245 | 0,079 |
| 302C--304H | 3TC60--3TC60 | 0,279 | 0,285  | -0,325 | -0,285 | -0,979 | 0,019 |
| 207H--311O | ARG37--3TC60 | 0,037 | 0,002  | -0,028 | -0,002 | 0,098  | 0,066 |
| 310H--308C | 3TC60--3TC60 | 0,278 | 0,280  | -0,317 | -0,280 | -0,972 | 0,038 |
| 304H--277H | 3TC60--GLU56 | 0,009 | -0,001 | -0,005 | 0,001  | 0,032  | 0,093 |



|            |              |       |        |        |        |        |       |
|------------|--------------|-------|--------|--------|--------|--------|-------|
| 300O--312H | 3TC60--3TC60 | 0,031 | 0,001  | -0,027 | -0,001 | 0,102  | 0,106 |
| 15O--308C  | GLU10--3TC60 | 0,003 | -0,001 | -0,002 | 0,001  | 0,014  | 1,181 |
| 305S--306C | 3TC60--3TC60 | 0,174 | 0,116  | -0,167 | -0,116 | -0,260 | 0,118 |
| 300O--306C | 3TC60--3TC60 | 0,237 | 0,282  | -0,444 | -0,282 | -0,485 | 0,056 |
| 312H--311O | 3TC60--3TC60 | 0,339 | 0,544  | -0,617 | -0,544 | -1,889 | 0,024 |
| 305S--73H  | 3TC60--LEU18 | 0,007 | -0,001 | -0,003 | 0,001  | 0,021  | 0,090 |
| 308C--306C | 3TC60--3TC60 | 0,249 | 0,197  | -0,254 | -0,197 | -0,565 | 0,050 |
| 308C--311O | 3TC60--3TC60 | 0,236 | 0,303  | -0,494 | -0,303 | -0,447 | 0,029 |
| 304H--282H | 3TC60--GLU56 | 0,009 | -0,002 | -0,005 | 0,002  | 0,033  | 0,539 |
| 300O--282H | 3TC60--GLU56 | 0,005 | -0,001 | -0,003 | 0,001  | 0,020  | 0,345 |
| 308C--309H | 3TC60--3TC60 | 0,279 | 0,283  | -0,321 | -0,283 | -0,983 | 0,037 |
| 306C--307H | 3TC60--3TC60 | 0,279 | 0,285  | -0,319 | -0,285 | -1,008 | 0,031 |
| 307H--282H | 3TC60--GLU56 | 0,006 | -0,001 | -0,003 | 0,001  | 0,024  | 1,063 |
| 311O--324H | 3TC60--WAT71 | 0,035 | 0,001  | -0,027 | -0,001 | 0,095  | 0,034 |
| 307H--286O | 3TC60--GLU56 | 0,013 | 0,000  | -0,008 | 0,000  | 0,032  | 0,018 |
| 309H--23H  | 3TC60--VAL12 | 0,000 | 0,000  | 0,000  | 0,000  | 0,000  | 1,145 |

**Table S3.** Descriptors of molecular VP in crystals and complexes.

| Refcode  | Molecule | Vmol   | Smol   | S <sub>S/H</sub> | S <sub>S/O</sub> | S <sub>S/C</sub> | S <sub>O/H</sub> | S <sub>C/H</sub> | S <sub>H/H</sub> | S <sub>H/N</sub> | S <sub>C/O</sub> | S <sub>C/C</sub> | S <sub>C/N</sub> | S <sub>N/O</sub> | S <sub>N/N</sub> | S <sub>O/O</sub> | S <sub>S/S</sub> | S <sub>S/N</sub> | S <sub>H/Cl</sub> | S <sub>Cl/Y</sub> |
|----------|----------|--------|--------|------------------|------------------|------------------|------------------|------------------|------------------|------------------|------------------|------------------|------------------|------------------|------------------|------------------|------------------|------------------|-------------------|-------------------|
| COWSUD   | 3TC      | 235.12 | 260.14 | 21.34            | 7.88             | 0.90             | 95.45            | 13.90            | 80.61            | 10.50            | 3.66             | 6.90             | 6.19             | 5.54             | 0.80             | 6.42             | 0.00             | 0.00             |                   |                   |
|          | H3TC(+)  | 254.55 | 272.25 | 26.94            | 5.26             |                  | 127.19           | 18.66            | 58.49            | 12.56            | 6.21             | 6.60             | 2.68             | 5.23             |                  | 2.43             | 0.00             | 0.00             |                   |                   |
| COWTAK   | 3TC      | 246.50 | 268.60 | 28.47            | 0.87             | 0.00             | 70.05            | 23.57            | 106.50           | 26.80            | 4.96             | 1.23             | 3.63             | 0.80             | 1.11             |                  | 0.61             | 0.00             |                   |                   |
| IGAVEU   | H3TC(+)  | 245.82 | 262.61 | 22.02            |                  |                  | 111.36           | 11.67            | 91.12            | 11.58            | 2.20             | 5.53             | 1.45             | 2.19             | 0.02             | 3.03             |                  | 0.43             |                   |                   |
|          | H3TC(+)  | 245.89 | 264.60 | 21.64            | 2.34             |                  | 109.05           | 12.17            | 93.70            | 12.93            | 2.47             | 5.53             | 1.45             | 2.22             | 0.02             | 0.64             |                  | 0.43             |                   |                   |
| LASZAI   | H3TC(+)  | 248.39 | 265.17 | 19.00            | 2.46             | 2.24             | 51.36            | 20.49            | 103.52           | 8.77             | 7.38             |                  |                  | 4.69             |                  | 0.17             |                  | 5.39             | 35.19             | 4.5               |
| LASZEM01 | H3TC(+)  | 250.87 | 265.80 | 29.04            | 0.18             | 1.85             | 60.14            | 21.66            | 103.04           | 11.45            | 6.43             |                  |                  | 5.23             |                  | 0.20             |                  | 0.57             | 19.64             | 6.38              |
| LICVEB   | 3TC      | 260.23 | 273.61 | 17.59            |                  | 0.05             | 76.75            | 12.84            | 90.42            | 13.09            | 1.16             | 7.97             | 6.61             | 2.12             | 2.99             | 3.97             | 0.63             |                  | 29.35             | 8.06              |
|          | 3TC      | 270.63 | 284.52 | 20.85            |                  | 0.44             | 71.62            | 14.57            | 94.32            | 14.67            | 1.99             | 7.28             | 7.25             | 2.51             | 2.58             | 3.75             | 1.03             |                  | 33.52             | 8.13              |
|          | H3TC(+)  | 252.47 | 275.86 | 22.78            | 3.10             | 0.96             | 82.15            | 11.21            | 78.00            | 13.31            | 2.06             | 7.28             | 7.25             | 2.53             | 2.58             | 1.67             | 1.03             |                  | 33.65             | 6.3               |
|          | H3TC(+)  | 254.62 | 274.98 | 24.59            | 0.79             |                  | 79.23            | 10.25            | 85.50            | 13.90            | 1.61             | 7.97             | 6.61             | 2.13             | 2.99             | 3.39             | 0.63             |                  | 32.20             | 3.17              |
| LIGWUV   | 3TC      | 249.03 | 270.06 | 31.78            | 1.19             |                  | 68.78            | 14.28            | 98.98            | 12.08            | 2.34             | 6.87             | 5.56             | 2.15             | 5.57             | 1.27             |                  |                  | 18.61             | 0.59              |
|          | 3TC      | 249.95 | 275.67 | 18.44            | 2.96             |                  | 74.01            | 13.61            | 117.95           | 12.37            | 2.40             | 6.88             | 5.56             | 1.27             | 5.57             | 2.89             |                  |                  | 11.14             | 0.62              |
|          | H3TC(+)  | 265.40 | 278.64 | 41.24            | 4.50             | 0.20             | 51.41            | 22.21            | 108.10           | 16.63            | 2.40             | 0.85             | 3.19             | 1.12             | 1.40             | 2.88             | 0.44             | 0.63             | 20.59             | 0.83              |
|          | H3TC(+)  | 252.23 | 273.39 | 29.96            | 0.26             |                  | 73.89            | 22.01            | 105.89           | 17.14            | 2.49             | 0.85             | 3.19             | 2.01             | 1.40             | 1.13             | 0.44             |                  | 11.07             | 1.67              |
| NUWKEX   | 3TC      | 242.44 | 265.52 | 15.68            |                  | 0.17             | 56.11            | 62.37            | 100.61           | 22.53            | 2.54             | 1.86             | 2.50             | 1.14             |                  | 0.01             |                  |                  |                   |                   |
| QUWXOW   | 3TC      | 230.48 | 262.84 | 31.35            | 3.26             | 1.43             | 58.41            | 25.77            | 113.63           | 25.35            | 0.41             |                  |                  |                  |                  | 0.13             |                  | 3.11             |                   |                   |
|          | 3TC      | 233.34 | 259.91 | 21.23            | 2.02             | 8.87             | 66.93            | 24.19            | 94.47            | 31.94            | 1.77             | 0.55             | 3.88             | 1.03             |                  | 0.14             |                  | 2.87             |                   |                   |
|          | 3TC      | 237.64 | 265.83 | 18.59            | 0.34             | 6.45             | 65.40            | 32.12            | 103.25           | 31.38            | 1.77             | 0.55             | 3.88             | 1.03             |                  |                  |                  | 1.05             |                   |                   |
|          | 3TC      | 239.85 | 260.70 | 34.94            | 3.02             | 4.10             | 62.80            | 25.41            | 101.02           | 25.49            | 0.98             |                  |                  | 0.93             |                  |                  |                  | 2.01             |                   |                   |
| RIBFIT   | H3TC(+)  | 255.03 | 269.56 | 22.93            |                  | 0.85             | 86.92            | 30.22            | 95.70            | 9.65             | 13.40            | 0.49             | 1.74             | 5.31             | 0.35             | 1.99             |                  |                  |                   |                   |
|          | H3TC(+)  | 253.52 | 271.24 | 21.64            |                  | 1.16             | 87.95            | 31.39            | 96.07            | 9.67             | 14.19            | 0.11             | 1.38             | 5.14             | 0.44             | 2.09             |                  |                  |                   |                   |
|          | H3TC(+)  | 253.42 | 276.90 | 20.67            | 1.65             | 1.51             | 87.06            | 29.90            | 101.20           | 9.38             | 12.91            | 0.93             | 1.44             | 6.33             | 0.07             | 3.85             |                  |                  |                   |                   |
|          | H3TC(+)  | 259.89 | 277.05 | 20.49            | 2.03             | 1.34             | 91.10            | 30.16            | 98.67            | 9.88             | 10.63            | 0.97             | 0.30             | 7.27             |                  | 4.22             |                  |                  |                   |                   |
| RIBFOZ   | H3TC(+)  | 261.55 | 270.48 | 14.44            | 3.41             |                  | 102.50           | 19.39            | 63.26            | 3.35             | 0.26             | 9.60             | 6.49             | 0.02             | 1.63             | 3.90             | 0.18             | 34.10            | 7.95              |                   |
|          | H3TC(+)  | 264.50 | 268.76 | 14.41            | 9.80             |                  | 97.39            | 17.92            | 59.24            | 3.41             | 1.87             | 10.20            | 7.07             | 0.02             | 1.63             | 1.07             | 0.18             | 35.59            | 8.98              |                   |
| RUKHAG   | 3TC      | 239.01 | 268.61 | 17.62            |                  | 12.08            | 61.43            | 24.01            | 104.16           | 33.99            | 2.54             |                  |                  | 1.76             |                  | 1.52             | 3.48             | 6.01             |                   |                   |
| RUKHAG01 | 3TC      | 237.05 | 257.23 | 21.92            | 0.23             | 1.07             | 63.38            | 22.10            | 103.86           | 34.78            | 2.11             | 3.62             | 0.89             | 1.62             |                  | 0.53             | 1.14             |                  |                   |                   |

|        |              |        |        |       |      |      |        |       |        |       |       |      |      |       |      |       |      |      |  |  |
|--------|--------------|--------|--------|-------|------|------|--------|-------|--------|-------|-------|------|------|-------|------|-------|------|------|--|--|
|        | 3TC          | 242.99 | 259.14 | 28.29 | 5.13 | 7.75 | 53.78  | 20.18 | 98.61  | 30.73 | 1.71  | 3.62 | 0.95 | 3.97  |      | 0.28  | 1.14 | 3.00 |  |  |
| UYEYEE | H3TC(+)      | 243.4  | 262.42 | 18.61 | 3.40 | 0.40 | 100.15 | 23.40 | 90.56  | 8.76  | 8.45  | 0.45 | 0.88 | 6.80  |      | 0.55  |      |      |  |  |
| VAWPIT | H3TC(+)      | 239.67 | 263.31 | 28.89 | 1.66 |      | 87.70  | 22.29 | 81.60  | 16.40 | 9.82  | 1.22 | 4.21 | 6.42  | 0.48 | 1.69  | 0.90 |      |  |  |
| VISVOK | H3TC(+)      | 266.84 | 273.39 | 23.63 | 4.68 | 3.73 | 110.15 | 23.12 | 70.65  | 12.42 | 7.91  | 3.12 | 3.72 | 1.10  | 0.06 | 2.76  | 4.24 | 2.10 |  |  |
|        | H3TC(+)      | 261.03 | 279.72 | 20.67 | 0.80 | 2.31 | 103.97 | 20.86 | 85.27  | 12.60 | 11.94 | 2.42 | 3.25 | 1.94  | 0.34 | 11.27 |      | 2.10 |  |  |
| VISVUQ | H3TC(+)      | 255.75 | 264.04 | 25.21 | 1.08 | 3.35 | 87.07  | 21.76 | 86.80  | 13.22 | 10.36 | 3.35 | 0.41 | 6.61  |      | 2.82  | 2.02 |      |  |  |
|        | H3TC(+)      | 244.33 | 265.78 | 25.04 | 2.84 | 2.86 | 95.46  | 23.82 | 89.65  | 12.76 | 5.50  |      |      | 3.48  | 0.06 | 2.02  | 2.29 |      |  |  |
| VISWAX | 3TC          | 232.91 | 266.03 | 24.41 | 1.91 |      | 74.77  | 11.58 | 111.48 | 18.59 | 1.53  | 8.30 | 7.20 | 0.01  | 2.07 | 4.18  |      |      |  |  |
|        | 3TC          | 233.44 | 255.56 | 16.69 | 3.50 | 1.02 | 77.90  | 12.06 | 102.05 | 19.30 | 1.54  | 8.30 | 7.20 | 0.01  | 2.07 | 3.92  |      |      |  |  |
| WOMHEM | 3TC          | 236.98 | 266.75 | 29.12 | 0.45 |      | 72.75  | 11.75 | 105.27 | 30.65 | 0.05  |      | 8.27 | 1.86  | 4.25 | 0.04  |      | 2.29 |  |  |
| modelA | 3TC          | 248.73 | 281.83 | 16.83 |      |      | 84.81  | 18.12 | 133.94 | 17.07 | 0.24  | 7.63 | 3.08 |       |      | 0.1   |      |      |  |  |
| modelB | 3TC          | 299.88 | 322.75 | 19.24 | 3.65 |      | 63.41  | 19.48 | 182.42 | 21.88 | 1.29  | 5.3  | 3.99 | 1.49  |      | 0.61  |      |      |  |  |
| 4QWD   | 3TC-<br>3TPP | 526.84 | 500.19 | 12.75 | 3.13 |      | 204.12 | 24.34 | 163.68 | 28.08 | 4.38  |      |      | 4.86  |      | 31.94 |      |      |  |  |
| 5TB8   | 3TC-<br>3TPP | 488.6  | 483.32 | 13.47 | 1.01 | 1.76 | 213.71 | 29.93 | 129.15 | 26.57 | 2.49  |      |      | 2.94  |      | 43.62 |      |      |  |  |
| 5TBC   | 3TC-<br>3TPP | 547.05 | 522.49 | 12.79 | 2.9  |      | 210.22 | 25.2  | 148.65 | 15.9  | 6.61  | 1.62 | 1.38 | 16.62 | 1.09 | 63.95 |      |      |  |  |
|        | 3TC-<br>1TPP | 399.2  | 398.21 | 22.53 |      |      | 131.6  | 22.84 | 132.88 | 11.82 | 9.12  | 1.59 | 5.18 | 6.35  | 8.44 | 38.93 |      |      |  |  |
